1 **Nitrate and nitrite exposure increases anxiety-like behavior and alters brain metabolomic**  
2 **profile in zebrafish**

3 Manuel García-Jaramillo<sup>1,2,3,\*†</sup>, Laura M. Beaver<sup>1,2,\*</sup>, Lisa Truong<sup>4</sup>, Elizabeth R. Axton<sup>2,5,6</sup>, Rosa  
4 M. Keller<sup>1</sup>, Mary C. Prater<sup>1,7</sup>, Kathy R. Magnusson<sup>2,8</sup>, Robyn L. Tanguay<sup>4</sup>, Jan F. Stevens<sup>2,6</sup>,  
5 Norman G. Hord<sup>1</sup>.

6 \* Co-first authors

7 † Corresponding author

8

9 *Addresses:*

10 <sup>1</sup>Nutrition Graduate Program, School of Biological and Population Health Sciences

11 Oregon State University

12 100 Milam Hall

13 Corvallis, OR 97331, USA

14

15 <sup>2</sup>Linus Pauling Institute

16 Oregon State University

17 307 Linus Pauling Science Center

18 Corvallis, OR 97331, USA

19

20 <sup>3</sup>Department of Chemistry

21 Oregon State University

22 Corvallis, OR, USA

23

24 <sup>4</sup>Department of Environmental and Molecular Toxicology

25 Sinnhuber Aquatic Research Laboratory

26 Oregon State University

27 Corvallis, OR 97331, USA

28

29 <sup>5</sup>Present Address: The Jackson Laboratory

30 1650 Santa Ana Avenue

31 Sacramento, CA 95838, USA

32

33 <sup>6</sup>Department of Pharmaceutical Sciences, College of Pharmacy

34 Oregon State University

35 Corvallis, OR 97331, USA

36

37 <sup>7</sup>Present Address: Department of Foods and Nutrition, College of Family and Consumer Sciences

38 University of Georgia

39 Athens, GA 30602, USA

40

41 <sup>8</sup>Department of Biomedical Sciences, Carlson College of Veterinary Medicine

42 Oregon State University

43 Corvallis, OR 97331, USA

44

45 E-mail addresses: M Garcia-Jaramillo: [manuel.g.jaramillo@oregonstate.edu](mailto:manuel.g.jaramillo@oregonstate.edu), LM Beaver:

46 [Laura.Beaver@oregonstate.edu](mailto:Laura.Beaver@oregonstate.edu), L Truong: [Lisa.Truong@oregonstate.edu](mailto:Lisa.Truong@oregonstate.edu), ER Axton:

47 Elizabeth.Axton@jax.org, RM Keller: kellerro@oregonstate.edu, MC Prater:  
48 praterm@oregonstate.edu, KR Magnusson: kathy.magnusson@oregonstate.edu, RL Tanguay:  
49 Robyn.Tanguay@oregonstate.edu, J.F. Stevens fred.stevens@oregonstate.edu, NG Hord:  
50 Norman.Hord@oregonstate.edu

51 **Funding Sources:** This work was supported in part by Celia Strickland and G. Kenneth Austin III  
52 Endowment (NGH), the Oregon Agricultural Experimental Station and OSU College of Pharmacy  
53 Faculty Development Funds (JFS). It was also supported by National Institutes of Health grants  
54 1S10RR027878-01 (JFS), and NIEHS Environmental Health Sciences P30 ES030287 (RLT). The  
55 content is solely the responsibility of the authors and does not necessarily represent the official  
56 views of the National Institutes of Health.

57

58

59

60

61

62

63

64

## 65 Abstract

### 66 Introduction

67 Dietary nitrate lowers blood pressure and improves athletic performance in humans, yet data  
68 supporting observations that it may increase cerebral blood flow and improve cognitive  
69 performance are mixed. Here we tested the hypothesis that nitrate and nitrite treatment would  
70 improve indicators of learning and cognitive performance in a zebrafish (*Danio rerio*) model. We  
71 also explored the extent to which nitrate and nitrite treatment affected the brain metabolome in  
72 order to understand how nitrate and nitrite supplementation may affect indices of cognitive  
73 function.

### 74 Methods

75 Fish were exposed to sodium nitrate (606.9 mg/L), sodium nitrite (19.5 mg/L), or control water  
76 for 2-4 weeks and free swim, startle response, innate predator avoidance, social cohesion, and  
77 shuttle box assays were performed.

### 78 Results

79 Nitrate and nitrite treatment did not change fish weight, length, predator avoidance, or distance  
80 and velocity traveled in an unstressed environment. Nitrate- and nitrite-treated fish initially  
81 experienced more negative reinforcement and increased time to decision in the shuttle box assay,  
82 which is consistent with a decrease in associative learning or executive function however, over  
83 multiple trials, all treatment groups demonstrated behaviors associated with learning. Nitrate and  
84 nitrite treatment significantly increased anxiety-like behavior but did not alter epinephrine,  
85 norepinephrine or dopamine levels. Targeted LC-MS/MS analysis revealed no significant increase

86 in brain nitrate or nitrite concentrations with treatment. An untargeted metabolomics analysis  
87 found 47 metabolites whose abundance was significantly altered in the brain with nitrate and nitrite  
88 treatment including an 18-19% reduction in the neurotransmitter  $\gamma$ -aminobutyric acid (GABA),  
89 and 17-22% reduction in its precursor, glutamine, which may contribute to the increased anxiety-  
90 like behavior.

## 91 **Conclusion**

92 Nitrate and nitrite treatment did not adversely affect multiple parameters of zebrafish health but  
93 was associated with mild anxiety-like behavior, changes in the brain metabolome, and caused a  
94 short-term decrease in executive function or associative learning.

95

96

97

## 98 Introduction

99 Nitrate ( $\text{NO}_3^-$ ), a component of leafy green and root vegetables, including beetroot juice (BRJ) and  
100 many green leafy vegetables, has blood pressuring-lowering and ergogenic effects in humans<sup>1</sup>.  
101 Nitrate supplementation (either as BRJ or sodium nitrate) has also demonstrated benefits pertaining  
102 to cardiovascular health<sup>2</sup>, such as reducing blood pressure, enhancing blood flow, and elevating  
103 the driving pressure of  $\text{O}_2$  in the microcirculation to areas of hypoxia or exercising tissue<sup>3,4</sup>. These  
104 findings are important to cardiovascular medicine and exercise physiology. Indeed, multiple  
105 studies support nitrate supplementation as an effective method to improve exercise performance<sup>5,6</sup>.  
106 Additionally, it has been reported that dietary nitrate can modulate cerebral blood-flow (CBF),  
107 decrease reaction time in neuropsychological tests, improve cognitive performance and suggest  
108 one possible mechanism by which vegetable consumption may have beneficial effects on brain  
109 function in humans<sup>7,8</sup>. In contrast, other recent studies have found no significant effect of nitrate  
110 or nitrite supplementation on cognitive function and this highlights the need for additional studies  
111 to clarify the effect of nitrate and nitrite treatment on cognitive function (reviewed in<sup>9,10</sup>).

112 Nitric oxide (NO) is a gaseous, free radical signaling molecule produced via enzymatic and  
113 non-enzymatic pathways. The enzymatic pathways for NO synthesis are produced by three distinct  
114 families of nitric oxide synthase (NOS) enzymes in mammals that use L-arginine and numerous  
115 co-factors as substrates<sup>11</sup>. NO conveys essential signaling in the cardiovascular, central nervous,  
116 and immune systems<sup>12</sup>. NO, through formation of S-nitrosothiols and nitration of alkenes or other  
117 nitrated species, is also considered to have hormone-like properties that take part in different  
118 metabolic/endocrine disorders such as diabetes and dysglycemia, thyroid disorders, hypertension,  
119 heart failure, and obesity<sup>13</sup>. Furthermore, NO plays an important role in regulation of  
120 synaptogenesis and neurotransmission in the central and peripheral nervous system<sup>14,15</sup>. NO can

121 also be produced by a NO synthase-independent method through the nitrate-nitrite-nitric oxide  
122 pathway. Nitrate present in foods or water is reduced endogenously by lingual nitrate reductases  
123 in mammals to nitrite (NO<sub>2</sub><sup>-</sup>) and, in the stomach, to nitric oxide (NO) before distribution via blood  
124 to tissues<sup>16,17</sup>. Several endogenous enzymes, proteins, and chemical species can reduce nitrite to  
125 NO including deoxygenated hemoglobin, xanthine oxidoreductase, deoxymyoglobin,  
126 mitochondrial enzymes, ascorbic acid, etc.<sup>18</sup> In spite of the vast amounts of research on NO  
127 production, NO-related signaling mechanisms, and the effects of nitrate supplementation on the  
128 cardiovascular system; there is still a gap in knowledge regarding whether dietary nitrate  
129 supplementation affects the brain metabolome, learning, and other brain functions.

130 In order to determine the physiological and cognitive effects derived from nitrate and nitrite  
131 exposure, we carried out a study with the aquatic model organism *Danio Rerio* (zebrafish).  
132 Zebrafish was chosen because it is a complex vertebrate organism that was originally established  
133 as a prime model for developmental studies and, is increasingly used for behavioral neuroscience  
134 research in part because of standardized and high throughput behavioral performance assays<sup>19–23</sup>.  
135 Importantly, as in humans, the nitrate-nitrite-nitric oxide pathway and NOS enzymes play  
136 important roles in regulating NO levels, along with cardiac and blood vessel development in  
137 zebrafish<sup>24</sup>. In addition, high genetic homology exists between zebrafish and humans for genes  
138 associated with disease<sup>25,26</sup>. Furthermore, we established that nitrate treatment in zebrafish  
139 improves the oxygen cost of exercise<sup>27</sup> as had been observed in humans. While conducting these  
140 experiments we also sought to test the hypothesis that nitrate and nitrite treatment would improve  
141 indicators of learning and cognitive performance. We also investigated the effects of nitrate and  
142 nitrite treatment on zebrafish behavior and the brain metabolome with the aim of elucidating  
143 mechanisms that may contribute to the potential improvement of cognitive performance. To this

144 end, adult zebrafish were exposed to sodium nitrate, sodium nitrite, or control water and tested for  
145 changes in learning, memory, and behavior. Furthermore, we utilized targeted and untargeted  
146 metabolomics analysis to examine the extent to which treatment resulted in changed nitrate or  
147 nitrite concentrations in the brain and altered the brain metabolome.

148

## 149 Materials and methods

### 150 **Fish Husbandry**

151 Wild type zebrafish (5D) were raised and maintained at the Sinnhuber Aquatic Research  
152 Laboratory (SARL) at Oregon State University on standard lab diet (Gemma Micro. Skretting,  
153 Tooele, France) in accordance with protocols approved by the Oregon State University  
154 Institutional Animal Care and Use Committee (IACUC). Adult fish 9-16 months of age were  
155 maintained at six fish per tank (3 male and 3 female) in 4-liter of aerated water in metal tanks. Fish  
156 water was made with reverse-osmosis water supplemented with Instant Ocean® (Spectrum Brands  
157 Blacksburg, VA) at 1.4 g of salt/gallon of water and conductivity between 500-600  $\mu$ S.  
158 Experiments contained three treatment groups which were treated for up to 31 days as 1) no  
159 treatment (control fish); 2) sodium nitrate-exposed fish (606.9 mg  $\text{NaNO}_3$  / L water); and 3)  
160 sodium nitrite-exposed fish (19.5 mg  $\text{NaNO}_2$  / L of water). The nitrate dose was chosen because it  
161 increased blood nitrate and nitrite levels, improved exercise performance, and was non-toxic in  
162 zebrafish<sup>27,28</sup>. The nitrite dose was chosen because it increased blood nitrite levels but was not  
163 associated with adverse effects at pathology with the exception of some mild irritation of gill  
164 epithelium<sup>27,29</sup>. For labeling experiments, a subset of fish was switched to water containing >99%  
165 stable isotopes of  $\text{Na}^{15}\text{NO}_3$ , or 100%  $\text{Na}^{15}\text{NO}_2$  (Cambridge Isotope Laboratories, Tewksbury, MA)



166 at day 28 for 3 days of treatment prior to collection. Nitrate and nitrite were dissolved in freshly  
167 prepared fish water and, unless otherwise indicated, chemicals were purchased from Sigma-  
168 Aldrich (St. Louis, MO). The fish water and treatment exposure were replaced every 36 hours  
169 throughout the duration of the experiment to maintain low ammonia levels and consistent  
170 treatments; pH was held at 6.8-7, total ammonia levels to 0-2.0 ppm, and temperature at 27-29 °C.  
171 Fish were fed a standard lab diet (Gemma Micro. Skretting, Westbrook, ME) at a volume of ~3%  
172 body weight/day. For sample collections fish were euthanized with an overdose of the anesthesia  
173 drug, tricaine mesylate, and all efforts were made to minimize suffering. Fish were then dried,  
174 weighed, measured for standard length, and brains were collected and snap frozen in liquid  
175 nitrogen. Samples were stored in -80°C until used for analysis.

176

#### 177 **Nitrate and nitrite quantification in water**

178 Water was collected during the first week of the experiment and saved directly after a water change  
179 (designated as fresh), or 36 h post water change (designated as used). For nitrate measurements,  
180 fish water was snap frozen directly. For nitrite measurements, 1 mL fish water was mixed with  
181 250 µL of a stop solution (containing potassium ferricyanide, N-ethylmaleimide, NP-40) as  
182 previously published<sup>30</sup>. Nitrate and nitrite concentrations were determined by ozone  
183 chemiluminescence as previously described on a Sievers Nitric Oxide Analyzer (NOA; Zysense,  
184 Frederick, CO)<sup>29,31</sup>. Water was collected on the second day of the experiment but was also  
185 confirmed to have similar values in an independent water collection 24 days into the experiment  
186 (data not shown).

187

#### 188 **Behavioral Assays**

189 Swimming behavior, startle response, innate predator avoidance, and social cohesion was tested  
190 in individual fish between 14-17 days of treatment, using a zebrafish visual imaging system (zVIS)  
191 as previously described<sup>32,33</sup>. Briefly, in the free swim assay fish were placed in a tank with 1.7L of  
192 water and the data from the first minute was ignored. The location of the fish was then analyzed  
193 by region of tank (top, middle, bottom) for the following 7 minutes (stressed, novel tank  
194 environment during minutes 1-8), and then during the last 7 minutes of the assay (minutes 11-18)  
195 speed and distance fish traveled was measured (unstressed environment). Habituation to an audio  
196 startle stimulus was tested in an array of 8 tanks (12cm × 12cm) filled with 750 mL of fish water<sup>32</sup>.  
197 Taps were generated by an electric solenoid below each tank. Following a 10-minute acclimation  
198 period, a total of five taps were delivered, with 20s following each tap, and the distance moved  
199 between taps was quantified. Predator response and social cohesion assays were completed in a  
200 tank with single side view of a LCD video projection. Movement and position were recorded  
201 during a one-minute acclimation period where there was no stimulus on the screen. Movement was  
202 also recorded directly following the acclimation period where one-minute videos were shown of  
203 either shoaling zebrafish (social stimulus) or a predator fish attacking its prey (predator stimulus).  
204 For data analysis, the tank was subdivided into three zones in relation to the video projection (close,  
205 middle, and far) and the time spent in each zone was calculated.

206 Custom-built shuttle boxes were used to test learning with a modified protocol as  
207 previously described<sup>32,34</sup>. The programmed protocol of this active avoidance conditioning test was  
208 designed to condition the zebrafish to leave the compartment with blue light (“reject side”) and  
209 swim to the dark side (“accept side”, also referred to as the correct side). There were a total of 30  
210 trials; each trial consisted of giving the zebrafish 8 seconds to “seek” a dark side of the tank after  
211 the blue light came on to avoid a moderate shock. If the fish did not move to the correct side, the

212 16 second (s) shock period was initiated. A moderate pulse of 5 V was delivered at 1 s intervals,  
213 for a duration of 500 ms. Fish were removed from the assay when they did not swim to the correct  
214 side during 8 consecutive trials and these fish were counted as repeatedly failed. The statistical  
215 method remained as previously described<sup>34</sup>, with the data fit using linear regression models to  
216 calculate the initial performance of the fish (intercept) and the rate of learning (slopes) for each  
217 recorded parameter including the period of time to decision and time shocked<sup>34</sup>.

218

### 219 **Epinephrine, Norepinephrine, and Dopamine Quantification**

220 Stress hormones epinephrine, norepinephrine, and their precursor dopamine were measured in fish  
221 (n=12) using the 3-CAT ELISA (Rocky Mountain Diagnostics, Inc., Colorado Springs, CO) per  
222 manufacturer's recommendations. Snap frozen whole zebrafish were ground in liquid nitrogen  
223 with mortar and pestle. To normalize variations in fish weight, the resulting whole fish powder  
224 was mixed with a buffer at a ratio of 100 mg fish powder to 500  $\mu$ L HCL buffer solution, containing  
225 EDTA and sodium metabisulfite. Samples were centrifuged for 20 minutes at 10,000  $\times$  g at 4°C  
226 and supernatants collected. A standard curve was generated for each compound concentrations of  
227 0.5, 1.5, 5, 20, and 80 ng/mL, for epinephrine and dopamine, and 0.2, 0.6, 2.0, 8.0, and 32.0 ng/mL  
228 for norepinephrine. Samples were diluted 1:1 to be in the range of the standard curve. A  
229 Spectramax<sup>®</sup> M2 plate reader (Molecular Devices, Sunnyvale, CA) was used to measure  
230 concentration at 450 nm.

231

### 232 **Extraction of zebrafish brains for analysis**

233 Twelve brains per treatment group were snap frozen using liquid nitrogen after four weeks of  
234 treatment and two brains were pooled together to compose each sample. Each sample was added

235 into 2 mL pre-filled tubes containing 300 mg of RNase and DNase free zirconium oxide beads  
236 (0.5 mm diameter, ceria stabilized, Next Advance, Averill Park, NY). A mixture of 80:20  
237 methanol: water at -80 °C was used as the extraction solvent as previously described<sup>35</sup>. Brains  
238 were homogenized with a bullet blender (Precellys® 24-bead-based homogenizer for 2 minutes at  
239 1350 rpm). Extracts were incubated at -20°C for 1 hour and then centrifuged at 13,000 rpm  
240 (Eppendorf, Hauppauge, NY) and 4°C for 10 min. The supernatant was split into three 1.5 mL  
241 Eppendorf tubes: 100 µL was aliquoted for nitrate and nitrite isotope targeted analysis by liquid  
242 chromatography with tandem mass spectrometry (LC-MS/MS); 200 µL was aliquoted for  
243 untargeted metabolomics analysis, and the remainder (variable volume) was reserved and stored  
244 at -80°C.

245

#### 246 **LC-MS/MS targeted nitrate and nitrite analysis**

247 In order to quantify nitrate and nitrite uptake into the brain, we used a previously described LC-  
248 MS/MS approach<sup>36</sup>. Assessing the percent enrichment ( $^{15}\text{N}/(^{15}\text{N}+^{14}\text{N}) \times 100\%$ ) allows us to  
249 determine the proportion of the nitrate and nitrite that was derived from exogenous sources (stable  
250 isotope treatment in water) versus endogenous source (nitrate oxidized from NO produced by NOS  
251 enzymes). This method utilizes 2,3-diaminonaphthalene (DAN) derivatization, which reacts with  
252 nitrite under acidic conditions to produce 2,3-naphthotriazole (NAT). The production NAT was  
253 measured with the previously described method<sup>36</sup> with minor modifications. Briefly, NAT was  
254 chromatographically separated on an InfinityLab Poroshell 120 HPH-C18 column (2.7 µm, 2.1 ×  
255 50 mm, Agilent, Santa Clara, CA), in a run time of 10 minutes, and detected using a multiple  
256 reaction monitoring (MRM) method on an ABSciex 3200 QTRAP mass spectrometer operated in

257 positive ionization mode. Mass spectrometry allows for the quantification of  $^{14}\text{N}$ -NAT ( $m/z$  170.1)  
258 and  $^{15}\text{N}$ -NAT ( $m/z$  171.1). The percent enrichment (%) was calculated as:  $[\frac{^{15}\text{N}}{^{15}\text{N}+^{14}\text{N}} \times 100]$ .

259

## 260 **Un-targeted metabolomics LC-MS/MS**

261 Aliquoted extracts were sonicated for 5 minutes and clarified by centrifugation at 13,000 rpm for  
262 10 minutes. The supernatant was transferred to glass mass spectrometry vials and LC-MS/MS-  
263 based metabolomics was performed as previously described<sup>27,37</sup>. Briefly, ultra-high-pressure liquid  
264 chromatography (UPLC) was performed on a Shimadzu Nexera system (Shimadzu, Columbia,  
265 MD) coupled to a quadrupole time-of-flight mass spectrometer (AB SCIEX TripleTOF 5600).  
266 Chromatographic separations were conducted on an Inertsil Phenyl-3 column ( $4.6 \times 150$  mm, GL  
267 Sciences, Torrance, CA). Elution was achieved using a binary gradient employing as solvent A  
268 water, and solvent B methanol, both containing 0.1% formic acid (v/v), as described previously<sup>37</sup>.  
269 LC-MS/MS conditions were adapted from Kirkwood et al. (2012)<sup>37</sup> with some modifications. The  
270 gradient started with 5% B and was held for 1 min at 5% B, followed by a 11-min linear gradient  
271 from 5% to 30 % B. The gradient was increased linearly to 100% B at 23 min, held for 5 min at  
272 100% B and, finally, stepped back to 5% B to equilibrate the column. The flow rate was 0.4  
273 mL/min. The auto-sampler temperature was held at 10°C, the column oven temperature at 50°C,  
274 and the injection volume was 5  $\mu\text{L}$ . Time-of-flight (TOF) mass spectrometry (MS) was operated  
275 with an acquisition time of 0.25 s and a scan range of 70–1200 Da. Tandem mass spectrometry  
276 (MS/MS) acquisition was performed with collision energy set at 35 V and collision energy spread  
277 of 15 V. Each MS/MS scan had an accumulation time of 0.17 s and a range of 50–1250 Da using  
278 information-dependent MS/MS acquisition (IDA). Ion source gas 1 and 2 and curtain gas (all  
279 nitrogen) were set at 50, 40, and 25, respectively. The source temperature was set at 500°C and

280 the ion spray voltage at 4.5 kV in positive ion mode. The mass calibration was automatically  
281 performed every 6 injections using an APCI positive/negative calibration solution (AB SCIEX)  
282 via a calibration delivery system (CDS). A separate quality control (QC) pool sample was prepared  
283 by combining 5  $\mu$ L of each sample. Quality control was assured by: (i) randomization of the  
284 sequence, (ii) injection of QC pool samples at the beginning and the end of the sequence and  
285 between each 10 actual samples, (iii) procedure blank analysis.

286

### 287 **Untargeted metabolomics data processing**

288 Raw data was imported into PeakView™ with XIC Manager 1.2.0 (ABSciex, Framingham, MA)  
289 for peak picking, retention time correction, and peak alignment. Metabolite identities were  
290 assigned as previously described by matching with an in-house library consisting of IROA  
291 standards (IROA Technology, Bolton, MA) and other commercially available standards (650  
292 total)<sup>27</sup>. The peak list was exported to MultiQuant 3.0.2 to integrate chromatograms to obtain peak  
293 area values for all of the assigned metabolites.

294

### 295 **Statistical Analysis**

296 To determine significant differences between three treatment group data were analyzed using a  
297 one-way ANOVA with Tukey post hoc test ( $P$ -value < 0.05, statistically significant) with  
298 GraphPad Prism 4 software (La Jolla, CA). Significant differences were calculated with two-way  
299 ANOVA and Tukey post hoc test or a repeated measures two-way ANOVA and Tukey post-hoc  
300 test ( $P$ -value < 0.05, statistically significant) when both treatment and another condition, like  
301 water condition, zone of tank, or a behavioral stimulus, was present<sup>38</sup>. For the shuttle box assay a  
302 linear regression was fitted to the data for each treatment to generate initial time and rate of

303 learning graphs, while a separate analysis of variance (AOV) followed by a Tukey's statistical  
304 difference was used to calculate statistical significance amongst the groups<sup>34</sup>. For metabolomics  
305 data, annotated metabolites were used to conduct multivariate statistical analysis. Pathway analysis  
306 and partial least squares-discriminant analysis (PLS-DA), were generated with MetaboAnalyst  
307 4.0<sup>39</sup>. The significance of individual metabolites between the treatment groups was assessed with  
308 a one-way ANOVA followed by Fisher's post-hoc analysis and Holm FDR-correction, with a *P*-  
309 value of < 0.05 and a *q*-value <0.1 indicating significance. If needed, data were logarithmically  
310 transformed to correct for unequal variance or non-normal distribution. No outliers were excluded  
311 from the statistical analyses. Figures were generated with Prism 8 (GraphPad Software, San Diego,  
312 CA), PowerPoint 2016 (Microsoft, Redmond, WA), and MetaboAnalyst 4.0<sup>39</sup>.

313

## 314 Results

### 315 **Effect of nitrate and nitrite treatment on health parameters and learning**

316 Treatment increased nitrate or nitrite levels in the fresh and used fish water (Fig. 1A and B).  
317 Furthermore, both nitrate and nitrite concentrations in control water were maintained at low levels  
318 throughout the treatment period (Fig. 1A and B). Several parameters of fish health, including fish  
319 length and weight, were not significantly changed with nitrate or nitrite treatment (Fig. 1C and D).  
320 Likewise, no significant differences were found between treatment groups for the distance and  
321 velocity fish traveled in an unstressed environment (Fig. 1E and F, *P* = 0.2089 and 0.2088,  
322 respectively). A startle response assay showed that both nitrate- and nitrite-treated fish became  
323 habituated to the vibration, similar to control fish, but nitrate-treated fish traveled a small but  
324 significant less distance (10%) following the startle (Fig. 1G).

325

326 In order to address if nitrate and nitrite treatments altered learning, fish were tested in a  
327 learning and memory assay using custom-built shuttle box, where over 30 consecutive trials they  
328 learned to avoid an adverse event (mild shock) by moving when a light came on (Fig. 2A). As seen  
329 from the linear regression calculated from the data, both nitrate and nitrite treated fish initially  
330 took longer to make a decision and were shocked longer (Fig. 2B). Over subsequent trials, more  
331 nitrate- and nitrite-treated fish (5-7% of the population tested) had to be removed from the assay  
332 because they repeatedly failed to learn (Fig. 2C). However, data from all trial periods show that  
333 both nitrate and nitrite treated fish were able to learn and had improved decision time and time  
334 shocked, as reflected in their rate of learning (Fig. 2D). It should be noted that the rate of learning  
335 (a negative slope) has a larger negative value with nitrate and nitrite treatment, relative to control  
336 because these fish had greater potential to improve based on their behavior at the beginning of the  
337 assay (Fig. 2B and D). When all fish that were tested are considered, nitrate and nitrite treatment  
338 was associated with a significant higher percentage of fish that failed to make a decision and were  
339 shocked (Fig. 2E). When the population is filtered to include only fish that could learn (i.e.,  
340 completed the assay), the nitrite-treated fish were no longer significantly impaired but significant  
341 deficits were still present in nitrate-treated fish for time shocked and time to decision (Fig. 2E).

342

### 343 **Effect of nitrate and nitrite treatment on behavior and catecholamine levels**

344 The effect of nitrate and nitrite exposure on predator avoidance and social cohesion was tested.  
345 Unexpectedly, nitrate-treated fish spent a statistically significant more time close to the monitor  
346 during the acclimation period (72%), while the nitrite-treated fish spent 37% more time close to  
347 the monitor (Fig. 3A). The social video stimulus did not significantly alter fish behavior in any  
348 treatment group as compared to the acclimation period (Fig. 3A). Nitrate and nitrite treated fish



349 moved away from the monitor when a predator video was shown, as seen by the significant  
350 decrease in time spent in the area close to the monitor (Fig. 3A and Supplemental Figure 1). Fish  
351 behavior was also tested in the free swim assay where fish were placed in a novel tank. As  
352 expected, control fish spent similar amounts of time at all three depths of the tank, balancing safety  
353 from predation and opportunity to find food (Fig. 3B). In contrast, there was a significant  
354 difference between the time the nitrate- and nitrite-treated fish spent between the bottom and top  
355 zones (Fig. 3B). Nitrate- and nitrite-treated fish spent 22-35% more time in the bottom zone, as  
356 compared to control fish. The increase in bottom-dwelling is consistent with anxiety-like behavior.  
357 Since anxiety can be associated with stress, we measured the levels of some stress hormones and  
358 found neither nitrate, nor nitrite treatment significantly increased epinephrine or norepinephrine  
359 levels (Fig. 3C). It appeared that nitrite-treated fish experienced lower concentrations of these  
360 hormones yet high variability between fish led to no significant differences being detected. Nitrate  
361 or nitrite treatment also did not significantly change dopamine concentrations which is the  
362 precursor for epinephrine and norepinephrine (Fig. 3C).

363

### 364 **Nitrate and nitrite uptake into the brain**

365 For the last three days of the experiment, a subset of fish was treated with  $^{15}\text{N}$ -nitrate or  $^{15}\text{N}$ -nitrite  
366 in order to study the uptake of nitrate and nitrite into brain tissue. The resulting percent enrichment  
367 results show the proportion of nitrate and nitrite derived from exogenous sources (the treatment in  
368 water) versus endogenous sources such as oxidation of NO from NOS-mediated production. We  
369 observed a low uptake of nitrate (14%) and almost no uptake of nitrite (0.1%) in the brain, which  
370 can be seen by comparing the fish that received labeled nitrate or nitrite as compared to the  
371 respective unlabeled nitrate or nitrite treatment conditions. (Fig. 4A and B). Furthermore, no

372 significant changes in nitrate or nitrite concentrations were detected in the brain of animals treated  
373 with nitrate or nitrite (Fig. 4A and B) when compared with the control group. Taken together, these  
374 results suggest that the behavioral changes observed with nitrate and nitrite exposure are likely  
375 due to indirect effects of treatment on brain metabolism, rather than a direct effect via influx of the  
376 nitrate or nitrite into the brain.

377

### 378 **Metabolomics Results**

379 One hundred twenty-four (124) metabolites were annotated using our in-house library (SI Table  
380 S1). Of these metabolites, 47 were significantly changed among at least one treatment group, as  
381 compared to the others and FDR-corrected  $P$ -values ( $q$ -values) for all significantly changed  
382 metabolites, between all treatment groups, are listed in SI Table S2. For example, deoxyadenosine  
383 diphosphate (dADP) was significantly up-regulated ( $q = 0.018$ ) in fish exposed to nitrate and  
384 nitrite, and desmosterol, the immediate precursor of cholesterol in the Bloch pathway of  
385 cholesterol biosynthesis, was significantly down-regulated ( $q = 0.018$ ) in fish exposed to nitrate  
386 and nitrite.

387 Partial least squares discriminant analysis (PLS-DA) demonstrates spatial clustering and  
388 separation between treatment groups when considering all the annotated compounds (Fig. 5A).  
389 There are two importance measures in PLS-DA: one is variable importance in projection (VIP)  
390 and the other is the weighted sum of absolute regression coefficients. The VIP graph of the most  
391 relevant 30 features (when considering the three treatments) is shown in Fig. 5B. The colored  
392 boxes on the right indicate the relative concentrations of the corresponding metabolite in each  
393 group under study. Among the positively correlated metabolites with the highest VIP scores

394 associated with the PLS-DA were dADP, desmosterol, linoleic acid, suberic acid, oleic acid and  
395 guanine.

396 Notably, nitrate or nitrite treatment resulted in significant differences among multiple  
397 metabolites involved in purine metabolism like hypoxanthine, xanthine, inosine, guanine,  
398 guanosine, deoxyadenosine diphosphate (dADP) and cyclic adenosine monophosphate (cAMP).  
399 Interestingly we also observed a significant decline in nicotinamide adenine dinucleotide  
400 phosphate (NADP) and NAD. We observed a significant depletion in the annotated fatty acids  
401 (linoleic acid (LA), eicosapentaenoic acid (EPA), and arachidonic acid (ARA)) with nitrate and  
402 nitrite treatments. Remarkably, LA was depleted by 50% by nitrate treatment and by ~90% in the  
403 nitrite treatment when considering normalized peak intensity values. Similarly, ARA was depleted  
404 by 80 and 60% in the nitrate and nitrite treatments, respectively. We also observed lower  
405 abundances for some of the annotated TCA (tricarboxylic acid cycle) cycle intermediates (i.e.  
406 malate and succinic acid). A depletion in amino acids threonine, N-acetyl-L-methionine (NAM),  
407 and phosphoserine, was observed with nitrate and nitrite treatment. Notably, we observed that  
408 nitrate and nitrite treatment had an effect on  $\gamma$ -aminobutyric acid (GABA, Fig. 6A), the chief  
409 inhibitory neurotransmitter in the developmentally mature central nervous system and its  
410 precursor, glutamine (Fig. 6B)<sup>40</sup>. Nitrate treatment caused a significant 22% reduction in the  
411 abundance of glutamine and 19% reduction in GABA in zebrafish brains. Nitrite treatment also  
412 caused a significant 17% reduction in the abundance of glutamine and 18% reduction of GABA in  
413 zebrafish brains. Interestingly, no significant differences in the abundance of the excitatory  
414 neurotransmitter glutamate were found with nitrate or nitrite treatments, thus GABA abundance  
415 changed in congruence with glutamine, but not glutamate levels.

416

## 417 Discussion

418 Here we disproved the hypothesis that nitrate, and nitrite treatment would improve indicators of  
419 learning and cognitive performance in a zebrafish model. While nitrate and nitrite treatment did  
420 not adversely affect multiple parameters of health, these treatments were associated with mild  
421 anxiety-like behavior and an initial deficit in learning, which was consistent with either decreased  
422 executive function or associative learning. While we have previously shown the nitrate and nitrite  
423 doses used here increased blood and whole body nitrate and nitrite levels, the treatments were not  
424 associated with a significant increase in the concentration of nitrate or nitrite in the brain, and only  
425 a minor, or almost no uptake of these chemicals into the brain. Nevertheless, some brain  
426 metabolites including GABA and glutamine were significantly decreased by nitrate and nitrite  
427 treatment suggesting that the changes in behavior and learning may be due to indirect effects of  
428 nitrate and nitrite treatment on the nervous system.

429 The anxiety-like behavior we observed with nitrate or nitrite treatment was mild compared  
430 to other anxiogenic and anxiolytic substances tested in adult zebrafish<sup>41</sup>. For example, ethanol  
431 exposure caused concentration- and time-dependent effects on brain ethanol levels and modulated  
432 locomotor-, aggression-, anxiety-, and fear-like behaviors in zebrafish<sup>42,43</sup>. Likewise, cannabinoids  
433 exposure triggered hypolocomotion, and deficits in spatial memory performance and fear  
434 learning<sup>44-47</sup>. Nicotine, morphine, and psychedelic drug exposure, or withdrawal, have numerous  
435 and expected anxiolytic and anxiogenic effects in zebrafish<sup>21</sup>. The nitrate- or nitrite-induced  
436 anxiety was more similar in scale to zebrafish that were not allowed to exercise<sup>48</sup>.

437 The zebrafish in this study exhibited increased anxiety, as evidenced by staying near the  
438 bottom of the novel tank. Nitrate and nitrite treatment also changed the behavior of fish during the

439 acclimation period of the predator and social stimulus assay. We also observed an initial delay in  
440 zebrafish decision making following a light stimulus and increased time being shocked initially in  
441 the shuttle box task which could represent an initial deficit in associative learning and/or executive  
442 function (e.g., decision making). This is inconsistent with literature that showed nitrate, given as  
443 BRJ supplement, improved reaction time and cognitive performance<sup>7,49–51</sup>. A plausible mechanism  
444 underlying nitrate-induced cognitive improvements is increased vasodilation, yielding improved  
445 CBF<sup>7,9,52,53</sup>. This is exemplified by a study in older adults where two days of consuming a high  
446 nitrate diet increased regional cerebral perfusion in frontal lobe white matter, particularly between  
447 the dorsolateral prefrontal cortex and anterior cingulate cortex<sup>52</sup>. These brain regions participate  
448 in executive function, which may have been affected by nitrate and nitrite treatment in our study.  
449 In contrast with our results, multiple studies show no significant association with foods containing  
450 nitrate and changes in cognitive function or mood<sup>54–60</sup>. Possible factors contributing to conflicting  
451 cognitive responses reports and our own study include different routes of treatment (continual in  
452 water vs episodic in meals), different nitrate doses and lengths of treatment, food matrix effects,  
453 age and health status of participants, or unidentified species-specific effects.

454 NO's myriad roles in the brain include acting as a anterograde neurotransmitter, a  
455 retrograde neurotransmitter, regulator of presynaptic plasticity in gabaergic and glutamatergic  
456 neurons, and effecting dendritic spine growth (reviewed in<sup>61</sup>). NO is directly involved in learning  
457 and memory, and NO modulators are being explored for the treatment of anxiety<sup>62</sup>. Manipulation  
458 of brain NO levels in rodents decreased anxiety when specific doses of L-arginine (NO precursor),  
459 L-NAME (NOS inhibitor), or sodium nitroprusside (NO donor) were given, but a high dose of L-  
460 NAME decreased locomotor activity, similar to our result<sup>63,64</sup>. Consistent with our increased  
461 anxiety-like behavior, studies in mice showed anxiogenic effects of sildenafil (NO donor), or the

462 combined treatment of sildenafil and ascorbic acid<sup>65-67</sup>. As manipulation of NO levels in the brain  
463 can yield both anxiolytic or anxiogenic effects, it is possible that the changes in behavior we  
464 observed may be attributable to high NO levels, but we have not assessed surrogate markers of  
465 this phenomenon, such as nitrated tyrosine levels in brain tissue<sup>62</sup>. However, our results showing  
466 low uptake of nitrate and nitrite treatments into the brain, and no significant changes in brain nitrate  
467 and nitrite concentrations indicate it is important to consider other indirect mechanisms and the  
468 metabolomics dataset can help inform this.

469         Reduction of brain GABA and glutamine levels we observed with nitrate and nitrite  
470 treatment, be it through increased NO in the brain or indirect mechanisms, is noteworthy because  
471 perturbations in the GABAergic system have been associated with anxiety and depression and thus  
472 may be an important player in the behavioral changes we observed<sup>68-70</sup>. Glutamine is a substrate  
473 for GABA production and serves as an important energy source for the nervous system. We also  
474 observed changes in brain purine-related metabolites, which is consistent with the known  
475 relationship between exogenous and endogenous pathways that generate NO<sup>18,24,27</sup>. The nitrate-  
476 and nitrite-induced reductions in fatty acids, neurotransmitters, signaling molecules, tricarboxylic  
477 acid cycle intermediates, and amino acids are also of interest and warrant future investigation. A  
478 significant limitation of this study is the use of whole zebrafish brains to derive metabolomics data,  
479 limiting our ability to draw inferences to specific functional structures within the brain, like the  
480 zebrafish equivalent of the prefrontal cortex<sup>71</sup>. Interestingly, a study in older adults using a more  
481 focused technique measured brain *N*-acetyl aspartate, creatine, choline, or myo-inositol levels and  
482 found no change with 3 day BRJ supplement<sup>57</sup>.

483         It is also possible that the changes in zebrafish behavior we observed were because nitrate  
484 and nitrite treatment caused a headache or migraine<sup>72</sup>. Headaches are a predominate side effect

485 from therapeutic use of organic nitrates, which are prodrugs for NO, cause vasodilation of blood  
486 vessels in the brain, and “immediate” mild-to-medium severity headaches or “delayed” migraines  
487 which involves cGMP or NO dependent S-nitrosylation-mediated changes in ion channel  
488 function<sup>73</sup>. Nitroglycerin has been used to model migraines in multiple species including fish<sup>74,75</sup>.  
489 Also, headache is the most common side effect in patients taking sildenafil, which promotes blood  
490 flow to organs like the brain, through cGMP. Furthermore, consumption of high nitrite foods was  
491 associated with headaches in some people<sup>76</sup>. Migraines have also been correlated in humans with  
492 oral microbiomes that increased abundances of nitrate, nitrite, and NO reductase genes supporting  
493 that nitrite and NO could promote migraines<sup>77</sup>. Given these various findings, it is possible in  
494 zebrafish that nitrate- or nitrite-induced production of NO in blood vessels stimulated vasodilation  
495 and caused a headache or migraine. While it is beyond the scope of this study to assess this  
496 possibility, future cognitive studies with nitrate, nitrite or BRJ treatment in the clinic should make  
497 note of the incidence of headaches and migraines.

498         It is also important to note that a body of literature shows that nitrate pollution in aquatic  
499 ecosystems can have adverse effects for a variety of species (reviewed in<sup>78</sup>). Likewise, human  
500 consumption of nitrate- and nitrite-contaminated water or excessive intake from vegetables may  
501 also cause adverse effects<sup>79</sup>. An endocrine disrupting role of nitrate and nitrite has been observed  
502 in various species, and the possible pathways of altering steroidogenesis have been proposed<sup>80</sup>.  
503 Both glutamate and GABA are involved in pituitary hormone release in fish. There is also good  
504 evidence for the involvement of GABA in luteinizing hormone release in fish<sup>81</sup>. Other studies have  
505 indicated that high nitrate and nitrite exposure from drinking water and diet may exert adverse  
506 effects on the development of the human nervous system<sup>82,83</sup>. Nitrate and nitrite can also perturb  
507 the activity of dopaminergic (DA) neurons by acting through estrogen receptor (ER) in early

508 development of zebrafish<sup>84</sup> at concentrations around the safety limit for drinking water  
509 recommended by the Environmental Protection Agency (EPA) and the World Health Organization  
510 (WHO) (10 mg/L NO<sub>3</sub>-N and 1 mg/L NO<sub>2</sub>-N, respectively)<sup>85</sup>. While many of these studies were  
511 conducted during embryonic development, and are different from own limited adult exposure, they  
512 highlight that nitrate and nitrite can have significant effects on the central nervous system.

513         As with all studies conducted in model organisms there are some specific contextual factors  
514 that make comparison to humans difficult. While zebrafish are used to model complex brain  
515 disorders, including anxiety, limitations exist because we must infer pain, discomfort or other  
516 behaviors through observation<sup>21 22,41,72</sup>. Another unique aspect of zebrafish exposure is ammonia  
517 in water. To address this potentially toxic metabolite, we regularly measured ammonia and found  
518 no effect of nitrate or nitrite treatment on water ammonia levels. Due to the large number of  
519 animals needed to conduct the study, we were limited in the number of doses we could test and  
520 thus focused on a nitrate dose and exposure duration associated with improvements in exercise  
521 performance<sup>27</sup>. More and larger studies are needed to delineate the potential benefits and risks  
522 associated with nitrate and/or nitrite treatment on CBF, mood, and cognitive function, particularly  
523 in populations of people with differing ages and underlying health status. Importantly, a study in  
524 humans is underway to look at the effect of increasing doses of nitrate on cognition-related  
525 outcomes<sup>86</sup>. We also cannot differentiate between the direct effects of nitrate or nitrite in the fish,  
526 or indirect effects that could be generated by increased NO availability. Nevertheless, we show  
527 that nitrate and nitrite treatment in a zebrafish model did not adversely affect multiple parameters  
528 of health but was associated with mild anxiety-like behavior, changes in brain metabolome, and  
529 an initial decrease in executive function or associative learning.

530



## 531 Acknowledgments

532 We thank Lindsey St. Mary, Eric Johnson, Carrie L. Barton, Sabrina Edwards, and Kimberly  
533 Hayward (Sinnhuber Aquatic Research Laboratory), Claudia S. Maier (Department of Chemistry  
534 and OSU Mass Spectrometry Center), and Jeffrey Morrè (Operational Manager, Oregon State  
535 University Mass Spectrometry Center) for technical assistance and advice.

536

## 537 Author Contributions

538 **Conceptualization:** MGJ, LMB, LT, ERA, RMK, RLT, JFS, NGH

539 **Data Curation:** MGJ, LMB, LT, RMK

540 **Formal Analysis:** MGJ, LMB, LT, RMK, KRM

541 **Funding Acquisition:** RLT, JFS, NGH

542 **Investigation:** MGJ, LMB, LT, ERA, RMK, MCP

543 **Methodology:** MGJ, LMB, LT, ERA, RMK, RLT, JFS, NGH

544 **Project Administration:** LMB, LT, ERA, RMK

545 **Software:** MGJ, LMB, LT

546 **Supervision:** JFS, NGH

547 **Validation:** MGJ, LMB, LT, KRM, JFS, NGH

548 **Visualization:** MGJ, LMB, LT, RMK

549 **Writing – original draft:** MGJ, LMB, LT

550 **Writing – review & editing:** MGJ, LMB, LT, ERA, RMK, MCP, KRM, RLT, JFS, NGH

551

552

553

## 554 Figure captions

555 **Fig 1. Nitrate and nitrite treatment did not adversely affect multiple parameters of health**  
556 **but nitrate treatment significantly decreased movement following a startle.** Adult zebrafish  
557 were treated with control water, sodium nitrate, or sodium nitrite and (A) nitrate and (B) nitrite  
558 concentrations were measured in newly treated fish water (fresh) and water at the end of 42-hour  
559 use (used) (n = 7-10). Fish (C) length and (D) weight was measured after 28-31 days of treatment  
560 (n = 18-33). At 14 – 17 days of treatment the (E) distance and (F) velocity zebrafish traveled was  
561 quantified in the voluntary swimming assay (n = 39-42) or (G) the response to five sequential  
562 acoustic startles (as taps against the fish tank) was quantified (n = 84-90). (A-G) Bars represent  
563 the mean  $\pm$  SEM.

564 **Fig 2. Nitrate and nitrite treatment were associated with an initial decline in learning but**  
565 **fish learned over repeated tests.** Adult zebrafish were treated with control water, sodium  
566 nitrate, or sodium nitrite for 14-17 days when learning and memory were tested in the shuttle box  
567 assay (n = 72-109). (A) Time-to-decision and time shocked was recorded for each fish and trial  
568 (dots) and linear regression of the data were calculated (lines). As calculated from the linear  
569 regression the bars indicate (B) initial periods of time fish spent for the indicated measure and  
570 (D) rates of learning as quantified by the slope from the linear regression. (C) Bars indicate the  
571 percentage of fish that were removed from the assay because they did not swim to the correct  
572 side during eight consecutive trials. (E) Statistical summary of shuttle box results as calculated  
573 by an analysis of variance (AOV) followed by a Tukey's post-test where "All" indicates data  
574 from all fish analyzed, while "Completed trials" excludes data from fish that repeatedly failed.

575 **Fig 3. Nitrate and nitrite treatment increased anxiety-like behavior in zebrafish.** Adult  
576 zebrafish were treated with control water, sodium nitrate, or sodium nitrite for 14-17 days. Fish  
577 movement was recorded and (A) the time fish spent in the zone closest to a monitor during an  
578 acclimation (no stimulus), or in the presence of a stimulus of a video of shoaling fish (social), or  
579 a predator (n = 42-84) was recorded. (B) Likewise, movement in a novel tank was recorded and  
580 the percent of time spent in the bottom, middle and top zones of tank are indicated (n = 83-89).  
581 (C) Concentrations of hormones were measured in whole fish by ELISA (n = 12). (A-G) Bars  
582 represent the mean  $\pm$  SEM.

583 **Fig 4. Little uptake of nitrate or nitrite from treatments was found in the brain.** The  
584 concentration of (A) nitrate or (B) nitrite was measured using targeted LC-MS/MS in control  
585 animals or animals treated with (A) unlabeled and  $^{15}\text{N}$ -labeled nitrate, or (B) unlabeled and  $^{15}\text{N}$ -  
586 labeled nitrite. (A-B) Zebrafish brains were collected on day 31 and percent enrichment (in  
587 boxes), indicates the relative amount of nitrate or nitrite in the brain that was derived from the  
588 treatment. Bars represent the mean concentration  $\pm$  SEM (n = 6).

589 **Fig 5. Nitrate and nitrite treatment significantly altered the abundance of some brain**  
590 **metabolites.** Adult zebrafish were treated with control water, sodium nitrate, or sodium nitrite for  
591 31 days and brain metabolites were measured using untargeted LC-MS/MS. (A) Partial least  
592 squares discriminant analysis (PLS-DA) scored plot demonstrates spatial clustering and separation  
593 between treatment groups when considering all the annotated compounds. (B) PLS-DA variable  
594 importance in projection (VIP) graph of the most relevant 30 features (when considering the three  
595 treatments). Colored boxes at right indicate the mean relative concentrations of the corresponding  
596 metabolite in each treatment group under study. Red color indicates higher abundance, while green  
597 color indicates lower abundance. The PLS-DA model display 95% confidence region.

598 Abbreviations: dADP (deoxyadenosine diphosphate), NAM (N-acetyl-L-methionine), 3-  
599 Hydroxybenzo (3-Hydroxybenzoic acid), 1-Aminocyclopr (1-Aminocyclopropane-1-  
600 carboxylate), 3PG (3-Phosphoglyceric acid), NADP (Nicotinamide adenine dinucleotide  
601 phosphate), ARA (Arachidonic acid), NAD (Nicotinamide adenine dinucleotide), EPA  
602 (Eicosapentanoic acid), 12-Hydroxydode (12-Hydroxydodecanoic acid), MMA (Methylmalonic  
603 acid), 2-Hydroxybutyrate (2-Hydroxybutyric acid).

604 **Fig 6. Nitrate and nitrite treatment decrease gamma-aminobutyric acid (GABA) and**  
605 **glutamine levels in zebrafish brain.** Adult zebrafish were treated with control water, sodium  
606 nitrate, or sodium nitrite for 31 days. Abundance of (A) GABA and (B) glutamine was measured  
607 in brain tissue by LC-MS/MS. Bars represent the mean peak area  $\pm$  SEM (n = 6).

608

## 609 Supplemental Figure Captions

610 **Supplemental Fig 1. Nitrate and nitrite treated fish avoided predators.** Adult zebrafish were  
611 treated with control water, sodium nitrate, or sodium nitrite for 14-17 days. Fish movement was  
612 recorded and (A) the time fish spent in the zone closest to a monitor during an acclimation (no  
613 stimulus), or in the presence of a predator (n = 84-42) was recorded. Bars represent the mean  $\pm$   
614 SEM.

615

## 616 Supplemental Table Captions

617 **Supplemental Table S1. Metabolites annotated using our in-house library.**

618 **Supplemental Table S2. Significantly changed metabolites, between all treatment groups.**

## 619 References

- 620 1. Hord, N. G., Tang, Y. & Bryan, N. S. Food sources of nitrates and nitrites: the physiologic  
621 context for potential health benefits. *Am. J. Clin. Nutr.* **90**, 1–10 (2009).
- 622 2. Hord, N. G. Dietary nitrates, nitrites, and cardiovascular disease. *Curr. Atheroscler. Rep.*  
623 **13**, 484–492 (2011).
- 624 3. Webb, A. J. *et al.* Acute blood pressure lowering, vasoprotective, and antiplatelet  
625 properties of dietary nitrate via bioconversion to nitrite. *Hypertens. (Dallas, Tex. 1979)*  
626 **51**, 784–790 (2008).
- 627 4. Kapil *et al.* Inorganic Nitrate Supplementation Lowers Blood Pressure in Humans.  
628 *Hypertension* **56**, 274–281 (2010).
- 629 5. Hoon, M. W., Johnson, N. A., Chapman, P. G. & Burke, L. M. The effect of nitrate  
630 supplementation on exercise performance in healthy individuals: a systematic review and  
631 meta-analysis. *Int. J. Sport Nutr. Exerc. Metab.* **23**, 522–532 (2013).
- 632 6. Jones, A. M. Dietary Nitrate Supplementation and Exercise Performance. **44**, (2014).
- 633 7. Wightman, E. L. *et al.* Dietary nitrate modulates cerebral blood flow parameters and  
634 cognitive performance in humans: A double-blind, placebo-controlled, crossover  
635 investigation. *Physiol. Behav.* **149**, 149–158 (2015).
- 636 8. Gilchrist, M. *et al.* Nitric Oxide Dietary nitrate supplementation improves reaction time in  
637 type 2 diabetes : Development and application of a novel nitrate-depleted beetroot juice  
638 placebo. *NITRIC OXIDE* **40**, 67–74 (2014).
- 639 9. Stanaway, L., Rutherford-Markwick, K., Page, R. & Ali, A. Performance and Health

- 640 Benefits of Dietary Nitrate Supplementation in Older Adults: A Systematic Review.  
641 *Nutrients* **9**, (2017).
- 642 10. McDonagh, S. T. J., Wylie, L. J., Thompson, C., Vanhatalo, A. & Jones, A. M. Potential  
643 benefits of dietary nitrate ingestion in healthy and clinical populations: A brief review.  
644 *Eur. J. Sport Sci.* **19**, 15–29 (2019).
- 645 11. Stuehr, D. J. & Vasquez-Vivar, J. Nitric oxide synthases—from genes to function. *Nitric*  
646 *oxide : biology and chemistry* **63**, 29 (2017).
- 647 12. Garthwaite, J. Glutamate, nitric oxide and cell-cell signalling in the nervous system.  
648 *Trends Neurosci.* **14**, 60–67 (1991).
- 649 13. Ghasemi, A. & Zahediasl, S. Is nitric oxide a hormone? *Iran. Biomed. J.* **15**, 59–65  
650 (2011).
- 651 14. Godfrey, E. W. & Schwarte, R. C. The role of nitric oxide signaling in the formation of  
652 the neuromuscular junction. *J. Neurocytol.* **32**, 591–602 (2003).
- 653 15. Kiss, J. P. Role of nitric oxide in the regulation of monoaminergic neurotransmission.  
654 *Brain Res. Bull.* **52**, 459–466 (2000).
- 655 16. Zweier, J. L., Wang, P., Samouilov, A. & Kuppusamy, P. Enzyme-independent formation  
656 of nitric oxide in biological tissues. *Nat. Med.* **1**, 804–809 (1995).
- 657 17. Zweier, J. L., Samouilov, A. & Kuppusamy, P. Non-enzymatic nitric oxide synthesis in  
658 biological systems. *Biochim. Biophys. Acta - Bioenerg.* **1411**, 250–262 (1999).
- 659 18. Lundberg, J. O., Weitzberg, E. & Gladwin, M. T. The nitrate-nitrite-nitric oxide pathway  
660 in physiology and therapeutics. *Nat. Rev. Drug Discov.* **7**, 156–167 (2008).

- 661 19. Bailey, J., Oliveri, A. & Levin, E. D. Zebrafish model systems for developmental  
662 neurobehavioral toxicology. *Birth Defects Res. C. Embryo Today* **99**, 14–23 (2013).
- 663 20. Bugel, S. M., Tanguay, R. L. & Planchart, A. Zebrafish: A marvel of high-throughput  
664 biology for 21(st) century toxicology. *Curr. Environ. Heal. reports* **1**, 341–352 (2014).
- 665 21. Müller, T. E. *et al.* Progress in Neuropsychopharmacology & Biological Psychiatry  
666 Understanding the neurobiological effects of drug abuse : Lessons from zebra fi sh  
667 models. **100**, (2020).
- 668 22. Shams, S., Rihel, J., Ortiz, J. G. & Gerlai, R. Neuroscience and Biobehavioral Reviews  
669 The zebra fi sh as a promising tool for modeling human brain disorders : A review based  
670 upon an IBNS Symposium. *Neurosci. Biobehav. Rev.* **85**, 176–190 (2018).
- 671 23. Stewart, A. M., Braubach, O., Spitsbergen, J., Gerlai, R. & Kalueff, A. V. Zebrafish  
672 models for translational neuroscience research: from tank to bedside. *Trends Neurosci.* **37**,  
673 264–278 (2014).
- 674 24. Jensen, F. B. Nitric oxide formation from nitrite in zebrafish. *J. Exp. Biol.* **210**, 3387 LP –  
675 3394 (2007).
- 676 25. Howe, K. *et al.* The zebrafish reference genome sequence and its relationship to the  
677 human genome. *Nature* **496**, 498–503 (2013).
- 678 26. Sykes, B. G. *et al.* The Relationship between Estrogen and Nitric Oxide in the Prevention  
679 of Cardiac and Vascular Anomalies in the Developing Zebrafish (Danio Rerio). *Brain Sci.*  
680 **6**, 51 (2016).
- 681 27. Axton, E. R. *et al.* Treatment with Nitrate, but Not Nitrite, Lowers the Oxygen Cost of

- 682 Exercise and Decreases Glycolytic Intermediates While Increasing Fatty Acid Metabolites  
683 in Exercised Zebrafish. *J. Nutr.* **149**, 2120–2132 (2019).
- 684 28. Learmonth, C. & Carvalho, P. Acute and Chronic Toxicity of Nitrate to Early Life Stages  
685 of Zebrafish — Setting Nitrate Safety Levels for Zebrafish Rearing. **12**, 305–311 (2015).
- 686 29. Voslarova, E., Pištěková, V. & Svobodová, Z. Nitrite Toxicity to Danio Rerio: Effects of  
687 Fish Age and Chloride Concentrations. *Acta Vet. Brno - ACTA VET BRNO* **75**, 107–113  
688 (2006).
- 689 30. Píknova, B. & Schechter, A. N. Measurement of nitrite in blood samples using the  
690 ferricyanide-based hemoglobin oxidation assay. *Methods Mol. Biol.* **704**, 39–56 (2011).
- 691 31. Conley, M. N., Roberts, C., Sharpton, T. J., Iwaniec, U. T. & Hord, N. G. Increasing  
692 dietary nitrate has no effect on cancellous bone loss or fecal microbiome in  
693 ovariectomized rats. *Mol. Nutr. Food Res.* **61**, (2017).
- 694 32. Knecht, A. L. *et al.* Transgenerational inheritance of neurobehavioral and physiological de  
695 ficits from developmental exposure to benzo [ a ] pyrene in zebra fi sh. *Toxicol. Appl.*  
696 *Pharmacol.* **329**, 148–157 (2017).
- 697 33. Knecht, A. L., Truong, L., Simonich, M. T. & Tanguay, R. L. Developmental  
698 benzo[a]pyrene (B[a]P) exposure impacts larval behavior and impairs adult learning in  
699 zebrafish. *Neurotoxicol. Teratol.* **59**, 27–34 (2017).
- 700 34. Truong, L., Mandrell, D., Mandrell, R., Simonich, M. & Tanguay, R. L. NeuroToxicology  
701 A rapid throughput approach identifies cognitive deficits in adult zebrafish from  
702 developmental exposure to polybrominated flame retardants. *Neurotoxicology* **43**, 134–



- 703 142 (2014).
- 704 35. Choi, J. *et al.* Novel function of vitamin E in regulation of zebrafish (*Danio rerio*) brain  
705 lysophospholipids discovered using lipidomics. *J. Lipid Res.* **56**, 1182–1190 (2015).
- 706 36. Axton, E. R., Hardardt, E. A. & Stevens, J. F. Stable isotope-assisted LC-MS/MS  
707 monitoring of glyceryl trinitrate bioactivation in a cell culture model of nitrate tolerance.  
708 *J. Chromatogr. B, Anal. Technol. Biomed. life Sci.* **1019**, 156–163 (2016).
- 709 37. Kirkwood, J. S. *et al.* Vitamin C deficiency activates the purine nucleotide cycle in  
710 zebrafish. *J. Biol. Chem.* **287**, 3833–3841 (2012).
- 711 38. Garcia, G. R., Bugel, S. M., Truong, L., Spagnoli, S. & Tanguay, R. L. AHR2 required for  
712 normal behavioral responses and proper development of the skeletal and reproductive  
713 systems in zebrafish. *PLoS One* **13**, e0193484 (2018).
- 714 39. Chong, J. *et al.* MetaboAnalyst 4.0: towards more transparent and integrative  
715 metabolomics analysis. *Nucleic Acids Res.* **46**, W486–W494 (2018).
- 716 40. Monesson-Olson, B. *et al.* Expression of the eight GABAA receptor  $\alpha$  subunits in the  
717 developing zebrafish central nervous system. *PLoS One* **13**, e0196083 (2018).
- 718 41. Stewart, A. *et al.* Modeling anxiety using adult zebrafish: a conceptual review.  
719 *Neuropharmacology* **62**, 135—143 (2012).
- 720 42. Gerlai, R., Lahav, M., Guo, S. & Rosenthal, A. Drinks like a fish: zebra fish (*Danio rerio*)  
721 as a behavior genetic model to study alcohol effects. *Pharmacol. Biochem. Behav.* **67**,  
722 773–782 (2000).
- 723 43. Fontana, B. D. *et al.* Pharmacology, Biochemistry and Behavior Modulatory action of

- 724 taurine on ethanol-induced aggressive behavior in zebra fi sh. *Pharmacol. Biochem.*  
725 *Behav.* **141**, 18–27 (2016).
- 726 44. Ruhl, T. *et al.* Acute administration of THC impairs spatial but not associative memory  
727 function in zebrafish. *Psychopharmacology (Berl)*. **231**, 3829–3842 (2014).
- 728 45. Ruhl, T., Moesbauer, K., Oellers, N. & von der Emde, G. The endocannabinoid system  
729 and associative learning and memory in zebrafish. *Behav. Brain Res.* **290**, 61–69 (2015).
- 730 46. Ruhl, T., Zeymer, M. & von der Emde, G. Cannabinoid modulation of zebrafish fear  
731 learning and its functional analysis investigated by c-Fos expression. *Pharmacol.*  
732 *Biochem. Behav.* **153**, 18–31 (2017).
- 733 47. Stewart, A. M. & Kalueff, A. V. The behavioral effects of acute  $\Delta^9$ -tetrahydrocannabinol  
734 and heroin (diacetylmorphine) exposure in adult zebrafish. *Brain Res.* **1543**, 109–119  
735 (2014).
- 736 48. DePasquale, C. & Leri, J. The influence of exercise on anxiety-like behavior in zebrafish  
737 (*Danio rerio*). *Behav. Processes* **157**, 638–644 (2018).
- 738 49. Gilchrist, M. *et al.* Dietary nitrate supplementation improves reaction time in type 2  
739 diabetes: development and application of a novel nitrate-depleted beetroot juice placebo.  
740 *Nitric oxide Biol. Chem.* **40**, 67–74 (2014).
- 741 50. Thompson, C. *et al.* Dietary nitrate supplementation improves sprint and high-intensity  
742 intermittent running performance. *Nitric oxide Biol. Chem.* **61**, 55–61 (2016).
- 743 51. Thompson, C. *et al.* Dietary nitrate improves sprint performance and cognitive function  
744 during prolonged intermittent exercise. *Eur. J. Appl. Physiol.* **115**, 1825–1834 (2015).

- 745 52. Presley, T. D. *et al.* Acute effect of a high nitrate diet on brain perfusion in older adults.  
746 *Nitric oxide Biol. Chem.* **24**, 34–42 (2011).
- 747 53. Joris, P. J., Mensink, R. P., Adam, T. C. & Liu, T. T. Cerebral Blood Flow Measurements  
748 in Adults: A Review on the Effects of Dietary Factors and Exercise. *Nutrients* **10**, (2018).
- 749 54. Clifford, T. *et al.* Effects of inorganic nitrate and nitrite consumption on cognitive  
750 function and cerebral blood flow: A systematic review and meta-analysis of randomized  
751 clinical trials. *Crit. Rev. Food Sci. Nutr.* **59**, 2400–2410 (2019).
- 752 55. Dobashi, S., Koyama, K., Endo, J., Kiuchi, M. & Horiuchi, M. Impact of Dietary Nitrate  
753 Supplementation on Executive Function During Hypoxic Exercise. *High Alt. Med. Biol.*  
754 **20**, 187–191 (2019).
- 755 56. Bondonno, C. P. *et al.* The acute effect of flavonoid-rich apples and nitrate-rich spinach  
756 on cognitive performance and mood in healthy men and women. *Food Funct.* **5**, 849–858  
757 (2014).
- 758 57. Kelly, J. *et al.* Effects of short-term dietary nitrate supplementation on blood pressure, O<sub>2</sub>  
759 uptake kinetics, and muscle and cognitive function in older adults. *Am. J. Physiol. Regul.*  
760 *Integr. Comp. Physiol.* **304**, R73-83 (2013).
- 761 58. Thompson, K. G. *et al.* Influence of dietary nitrate supplementation on physiological and  
762 cognitive responses to incremental cycle exercise. *Respir. Physiol. Neurobiol.* **193**, 11–20  
763 (2014).
- 764 59. Shannon, O. M. *et al.* Effects of Dietary Nitrate Supplementation on Physiological  
765 Responses, Cognitive Function, and Exercise Performance at Moderate and Very-High

- 766 Simulated Altitude . *Frontiers in Physiology* **8**, 401 (2017).
- 767 60. Lefferts, W. K., Hughes, W. E., White, C. N., Brutsaert, T. D. & Heffernan, K. S. Effect  
768 of acute nitrate supplementation on neurovascular coupling and cognitive performance in  
769 hypoxia. *Appl. Physiol. Nutr. Metab. = Physiol. Appl. Nutr. Metab.* **41**, 133–141 (2016).
- 770 61. Picón-Pagès, P., Garcia-Buendia, J. & Muñoz, F. J. Functions and dysfunctions of nitric  
771 oxide in brain. *Biochim. Biophys. Acta - Mol. Basis Dis.* **1865**, 1949–1967 (2019).
- 772 62. Pitsikas, N. The role of nitric oxide (NO) donors in anxiety. Lights and shadows. *Nitric  
773 oxide Biol. Chem.* **77**, 6–11 (2018).
- 774 63. Spiacci, A., Kanamaru, F., Guimarães, F. & Oliveira, R. Nitric oxide-mediated anxiolytic-  
775 like and antidepressant-like effects in animal models of anxiety and depression.  
776 *Pharmacol. Biochem. Behav.* **88**, 247–255 (2008).
- 777 64. Papageorgoulis, A., Fallon, P., Mpalantes, N., Papageorgouli, D. & Pitsikas, N. Repeated  
778 but not acute exposure with a low dose range of the nitric oxide (NO) donor sodium  
779 nitroprusside (SNP) induces anxiolytic-like behaviour in a dose-independent manner in  
780 two different rat models of anxiety. *Nitric oxide Biol. Chem.* **99**, 1–6 (2020).
- 781 65. Kurt, M. *et al.* Effect of sildenafil on anxiety in the plus-maze test in mice. *Pol. J.  
782 Pharmacol.* **56**, 353–357 (2004).
- 783 66. Shahidi, S., Hashemi-Firouzi, N. & Mahmoodi, M. Modulation of Anxiety-Like Behavior  
784 in Sildenafil Citrate-Treated Mice Placed in an Elevated Plus-Maze TT -. *BCN* **2**, 53–57  
785 (2011).
- 786 67. Walia, V., Garg, C. & Garg, M. Nitrenergic signaling modulation by ascorbic acid treatment

- 787 is responsible for anxiolysis in mouse model of anxiety. *Behav. Brain Res.* **364**, 85–98  
788 (2019).
- 789 68. Pehrson, A. L. & Sanchez, C. Altered gamma-aminobutyric acid neurotransmission in  
790 major depressive disorder: a critical review of the supporting evidence and the influence  
791 of serotonergic antidepressants. *Drug Des. Devel. Ther.* **9**, 603–624 (2015).
- 792 69. Kantrowitz, J., Citrome, L. & Javitt, D. GABA(B) receptors, schizophrenia and sleep  
793 dysfunction: a review of the relationship and its potential clinical and therapeutic  
794 implications. *CNS Drugs* **23**, 681–691 (2009).
- 795 70. Greenfield, L. J. J. Molecular mechanisms of antiseizure drug activity at GABAA  
796 receptors. *Seizure* **22**, 589–600 (2013).
- 797 71. Bloch, S., Froc, C., Pontiggia, A. & Yamamoto, K. Existence of working memory in  
798 teleosts: Establishment of the delayed matching-to-sample task in adult zebrafish. *Behav.*  
799 *Brain Res.* **370**, 111924 (2019).
- 800 72. Maximino, C. *et al.* Measuring anxiety in zebrafish : A critical review. *Behav. Brain Res.*  
801 **214**, 157–171 (2010).
- 802 73. Bagdy, G., Riba, P., Kecskemeti, V., Chase, D. & Juhasz, G. Headache-type adverse  
803 effects of NO donors: vasodilation and beyond. *Br. J. Pharmacol.* **160**, 20–35 (2010).
- 804 74. Demartini, C. *et al.* Nitroglycerin as a comparative experimental model of migraine pain:  
805 From animal to human and back. *Prog. Neurobiol.* **177**, 15–32 (2019).
- 806 75. Kovacic, S. *et al.* Increased permeability of the blood-brain barrier following  
807 administration of glyceryl trinitrate in common carp (*Cyprinus carpio* L.). *Coll. Antropol.*

- 808           **32 Suppl 1**, 99–103 (2008).
- 809   76.   Henderson, W. R. & Raskin, N. H. ‘Hot-dog’ headache: individual susceptibility to nitrite.  
810       *Lancet (London, England)* **2**, 1162—1163 (1972).
- 811   77.   Gonzalez, A. *et al.* Migraines Are Correlated with Higher Levels of Nitrate-, Nitrite-, and  
812       Nitric Oxide-Reducing Oral Microbes in the American Gut Project Cohort. *mSystems* **1**,  
813       (2016).
- 814   78.   Camargo, J. A., Alonso, A. & Salamanca, A. Nitrate toxicity to aquatic animals: a review  
815       with new data for freshwater invertebrates. *Chemosphere* **58**, 1255–1267 (2005).
- 816   79.   Bryan, N. & Loscalzo, J. *Nitrite and Nitrate in Human Health and Disease*. (Humana  
817       Press, 2011).
- 818   80.   Guillette, L. J. J. & Edwards, T. M. Is nitrate an ecologically relevant endocrine disruptor  
819       in vertebrates? *Integr. Comp. Biol.* **45**, 19–27 (2005).
- 820   81.   Trudeau, V. L. *et al.* The role of amino acid neurotransmitters in the regulation of pituitary  
821       gonadotropin release in fish. *Biochem. Cell Biol.* **78**, 241–259 (2000).
- 822   82.   Arbuckle, T. E., Sherman, G. J., Corey, P. N., Walters, D. & Lo, B. Water nitrates and  
823       CNS birth defects: a population-based case-control study. *Arch. Environ. Health* **43**, 162–  
824       167 (1988).
- 825   83.   Croen, L. A., Todoroff, K. & Shaw, G. M. Maternal exposure to nitrate from drinking  
826       water and diet and risk for neural tube defects. *Am. J. Epidemiol.* **153**, 325–331 (2001).
- 827   84.   Jannat, M., Fatimah, R. & Kishida, M. Nitrate (NO<sub>3</sub><sup>-</sup>) and nitrite (NO<sub>2</sub><sup>-</sup>) are endocrine  
828       disruptors to downregulate expression of tyrosine hydroxylase and motor behavior

- 829 through conversion to nitric oxide in early development of zebrafish. *Biochem. Biophys.*  
830 *Res. Commun.* **452**, 608–613 (2014).
- 831 85. World Health Organization. *Nitrate and Nitrite in Drinking Water. Nitrate and Nitrite in*  
832 *Drinking Water* (2015). doi:10.17226/9038
- 833 86. Babateen, A. M. *et al.* Protocol and recruitment results from a 13-week randomized  
834 controlled trial comparing the effects of different doses of nitrate-rich beetroot juice on  
835 cognition, cerebral blood flow and peripheral vascular function in overweight and obese  
836 older people. *Contemp. Clin. trials Commun.* **18**, 100571 (2020).
- 837

**A**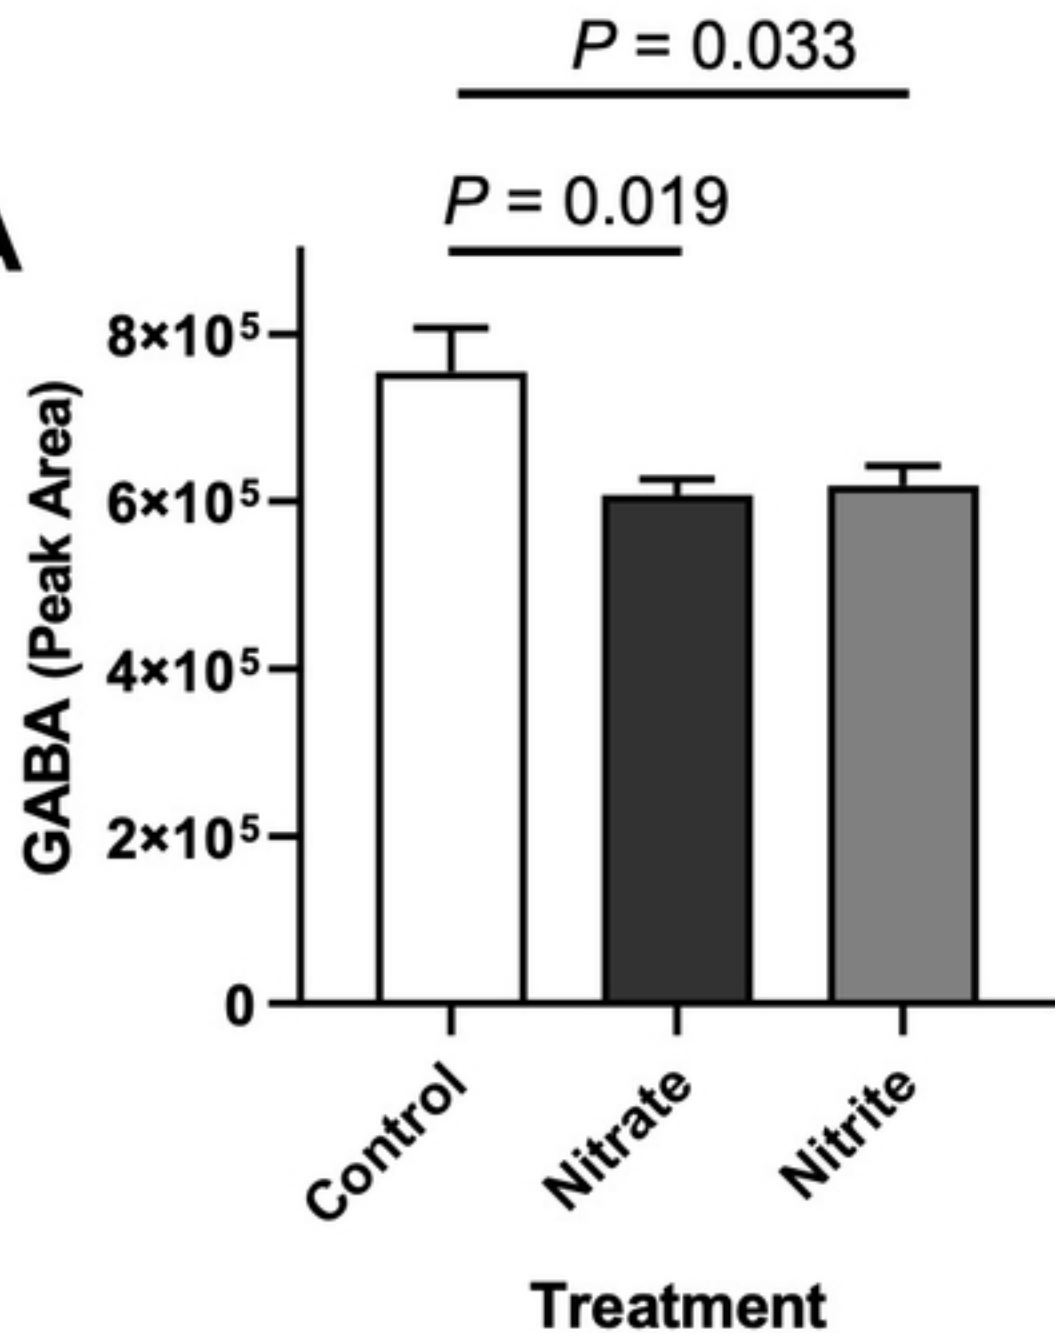**B**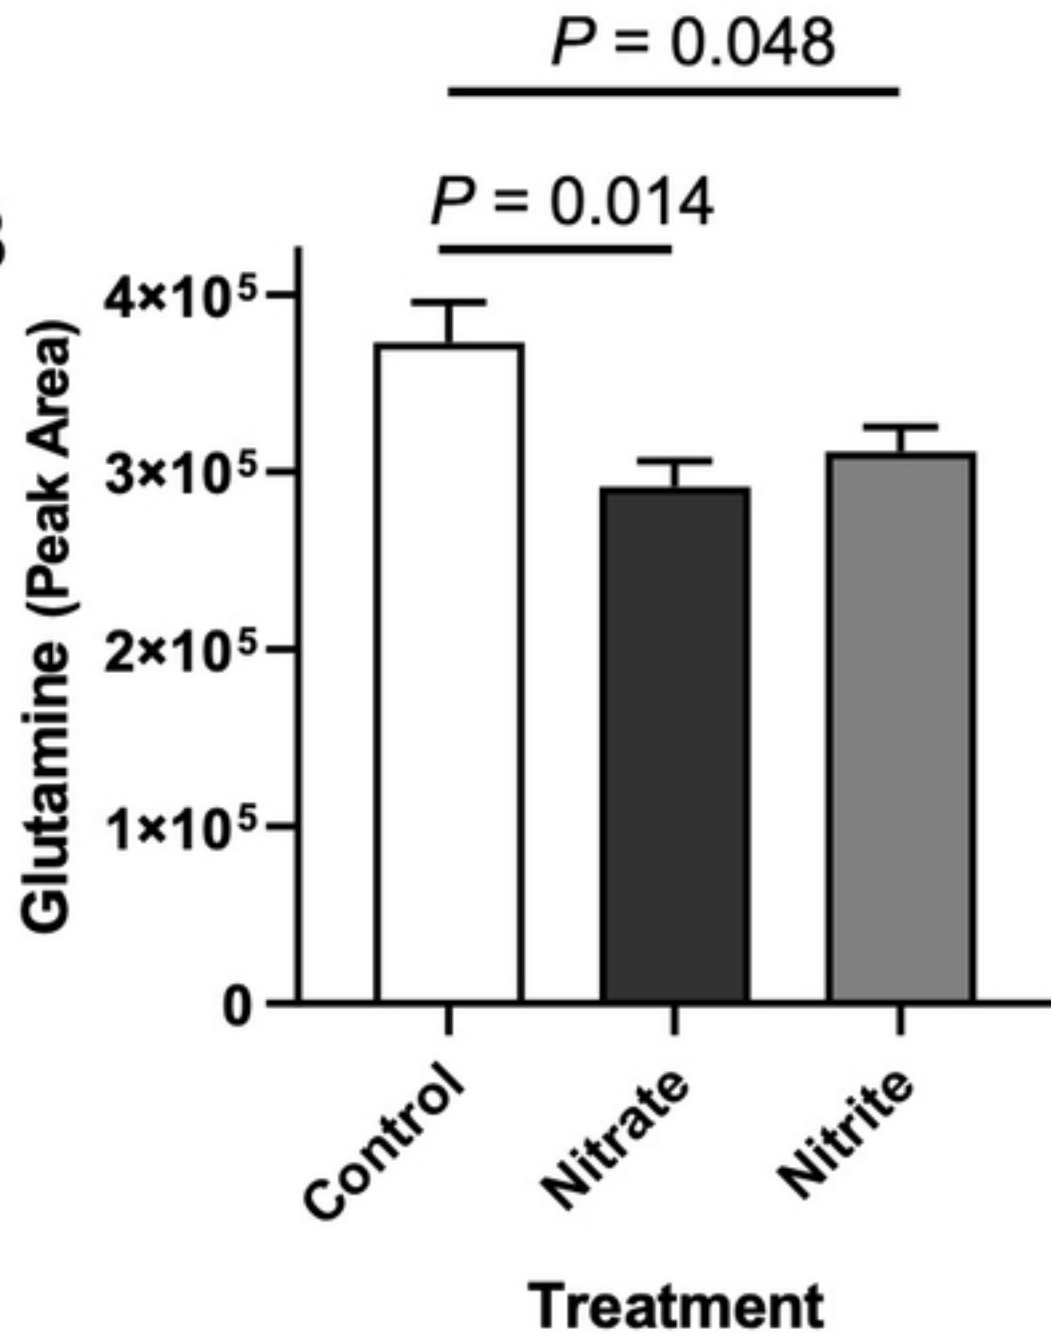



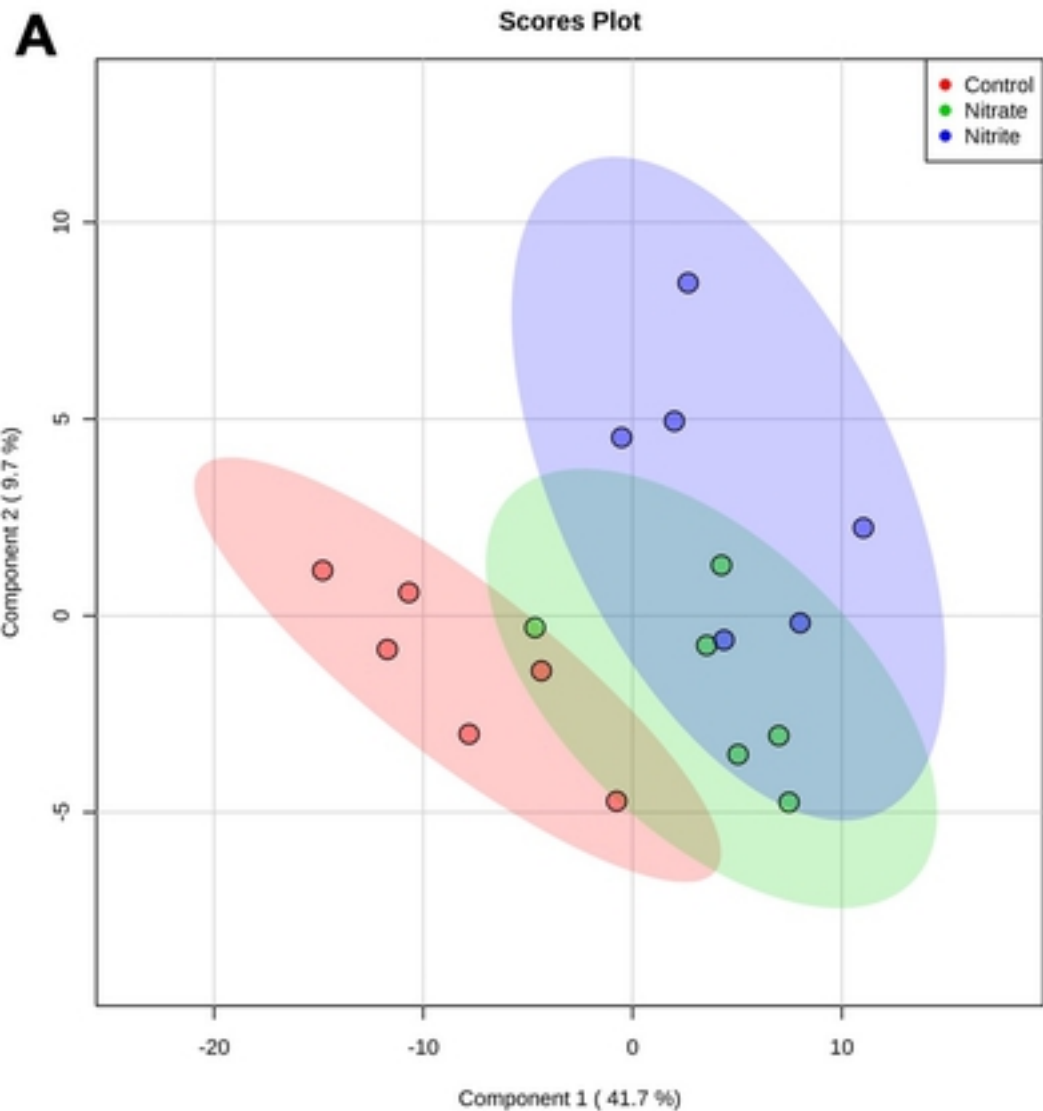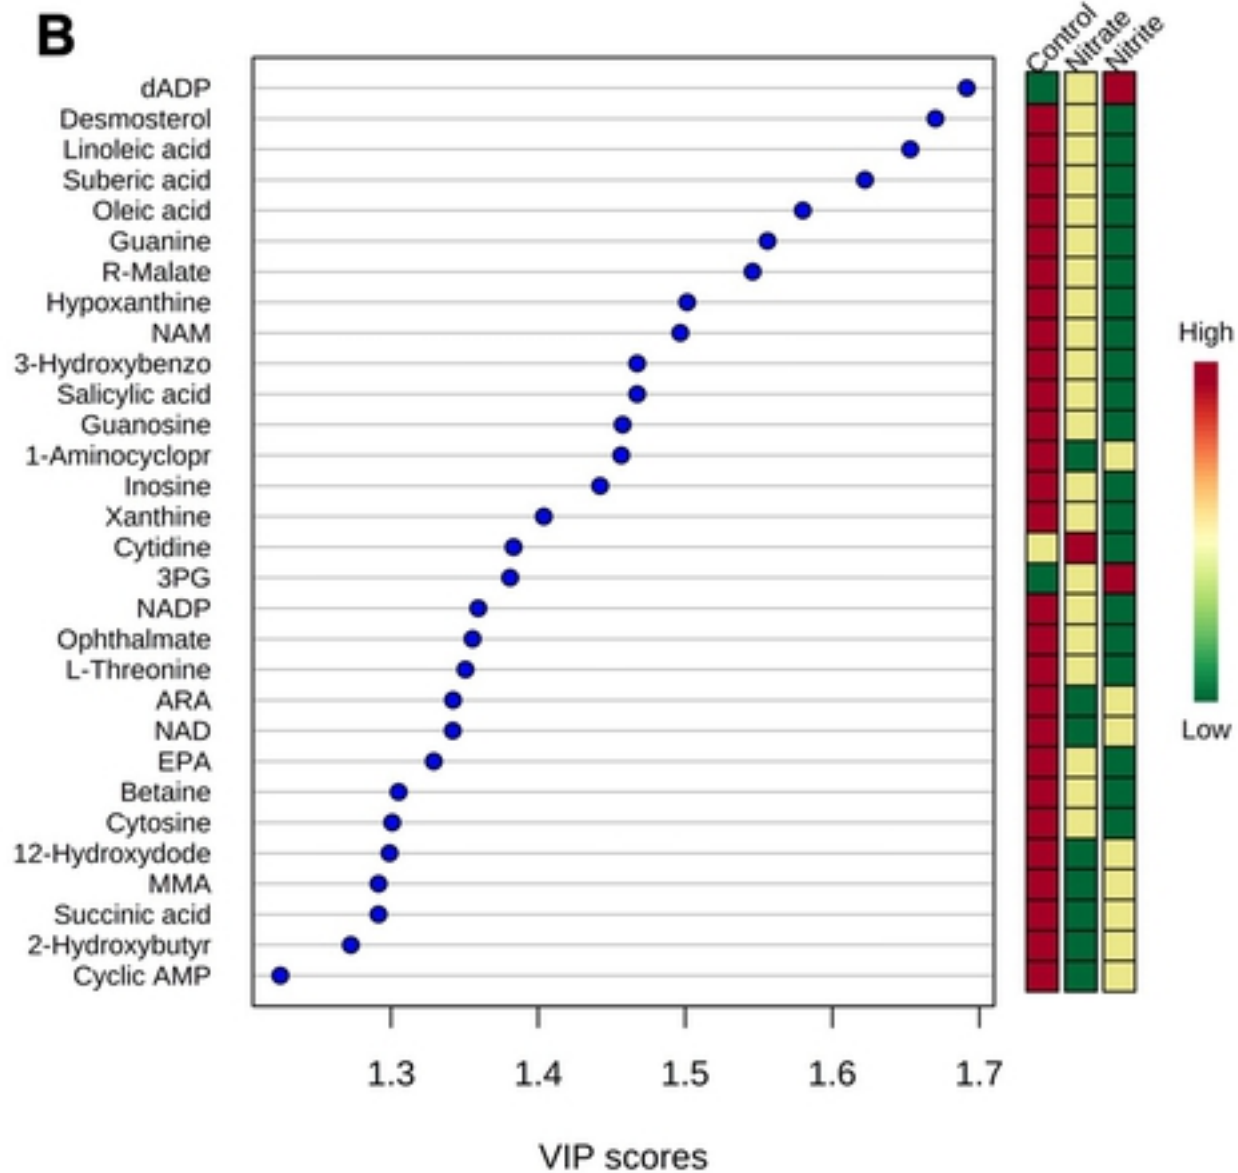

**A**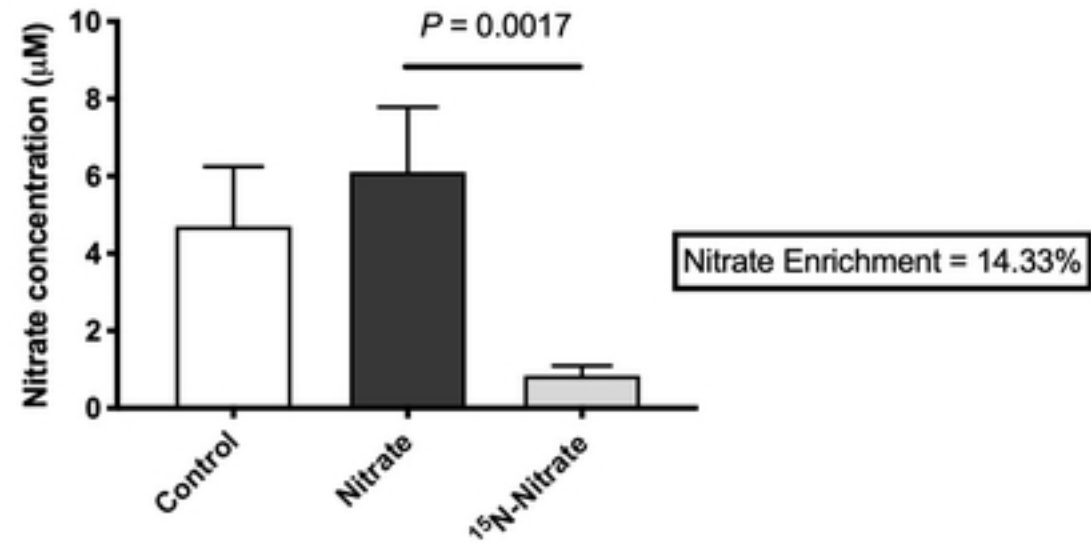**B**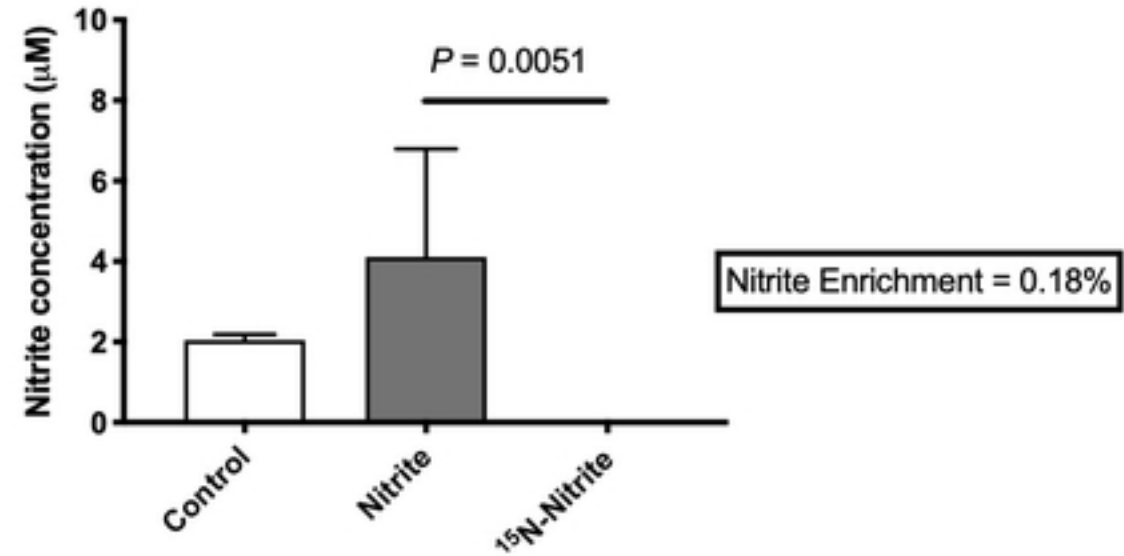

**A**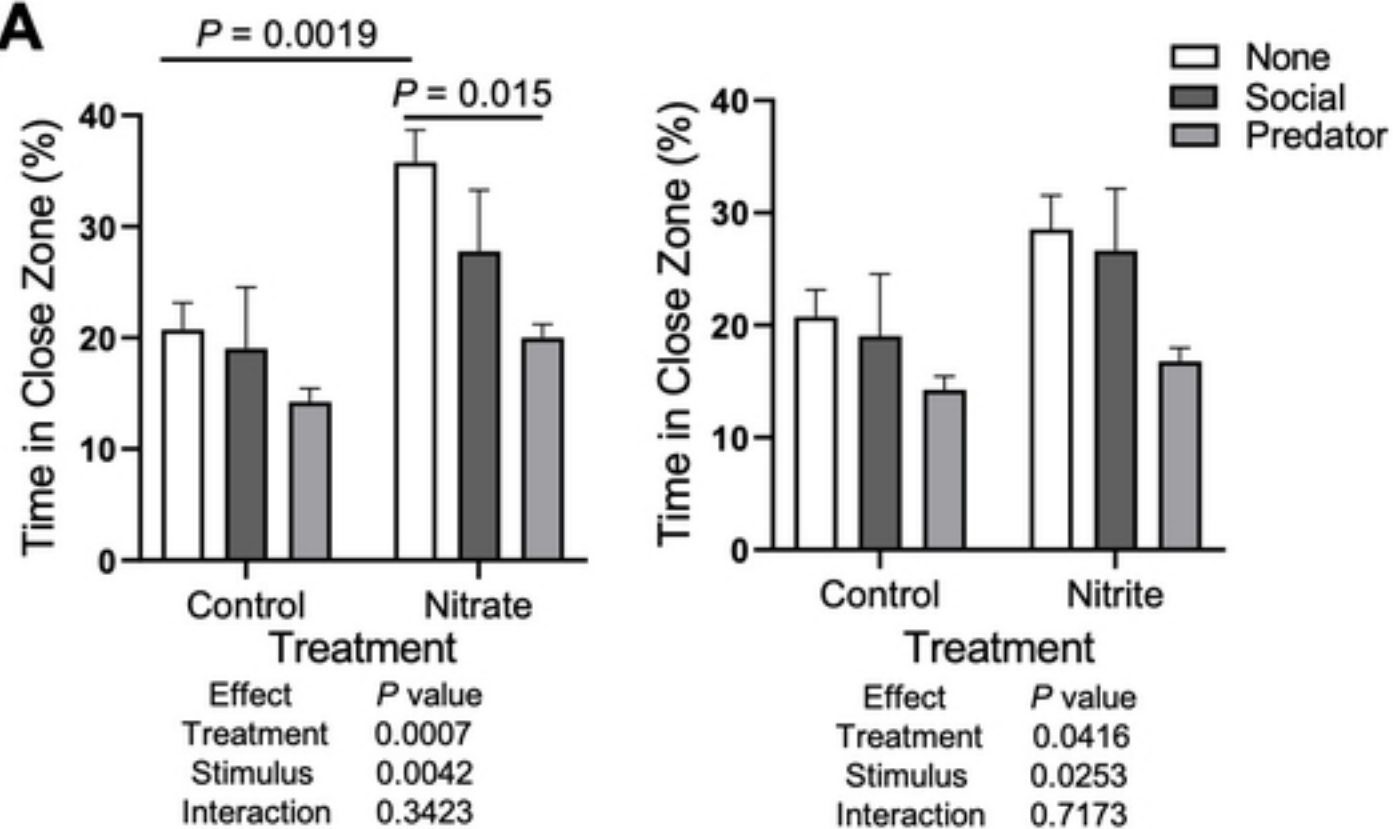**B**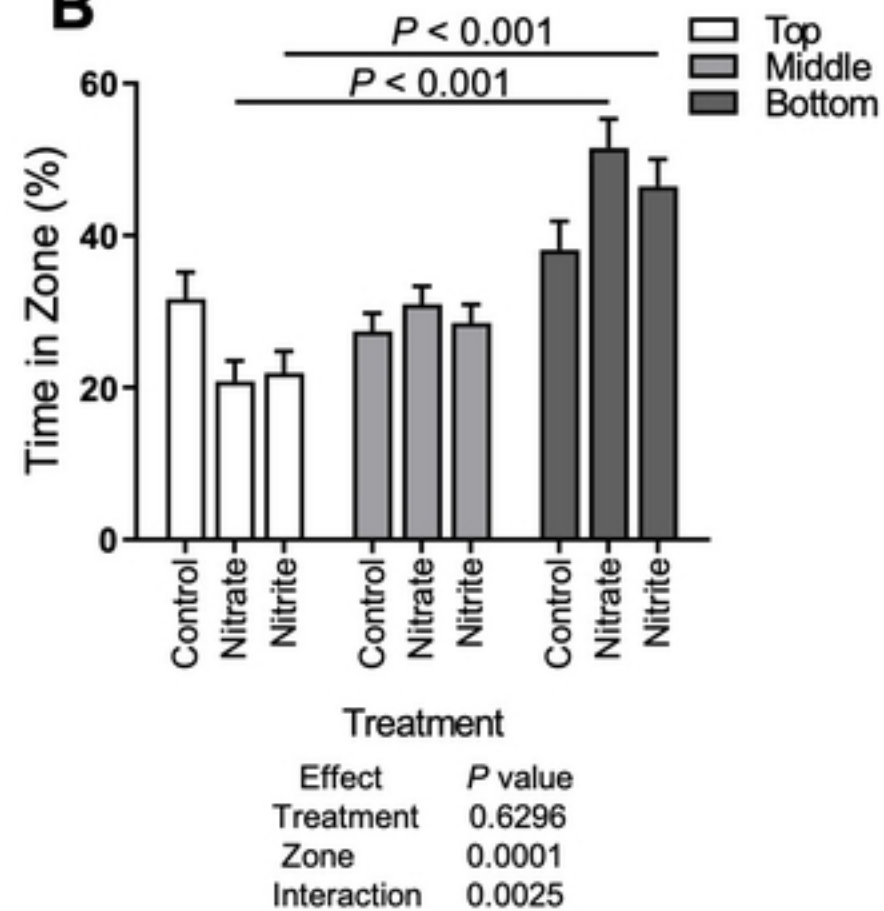**C**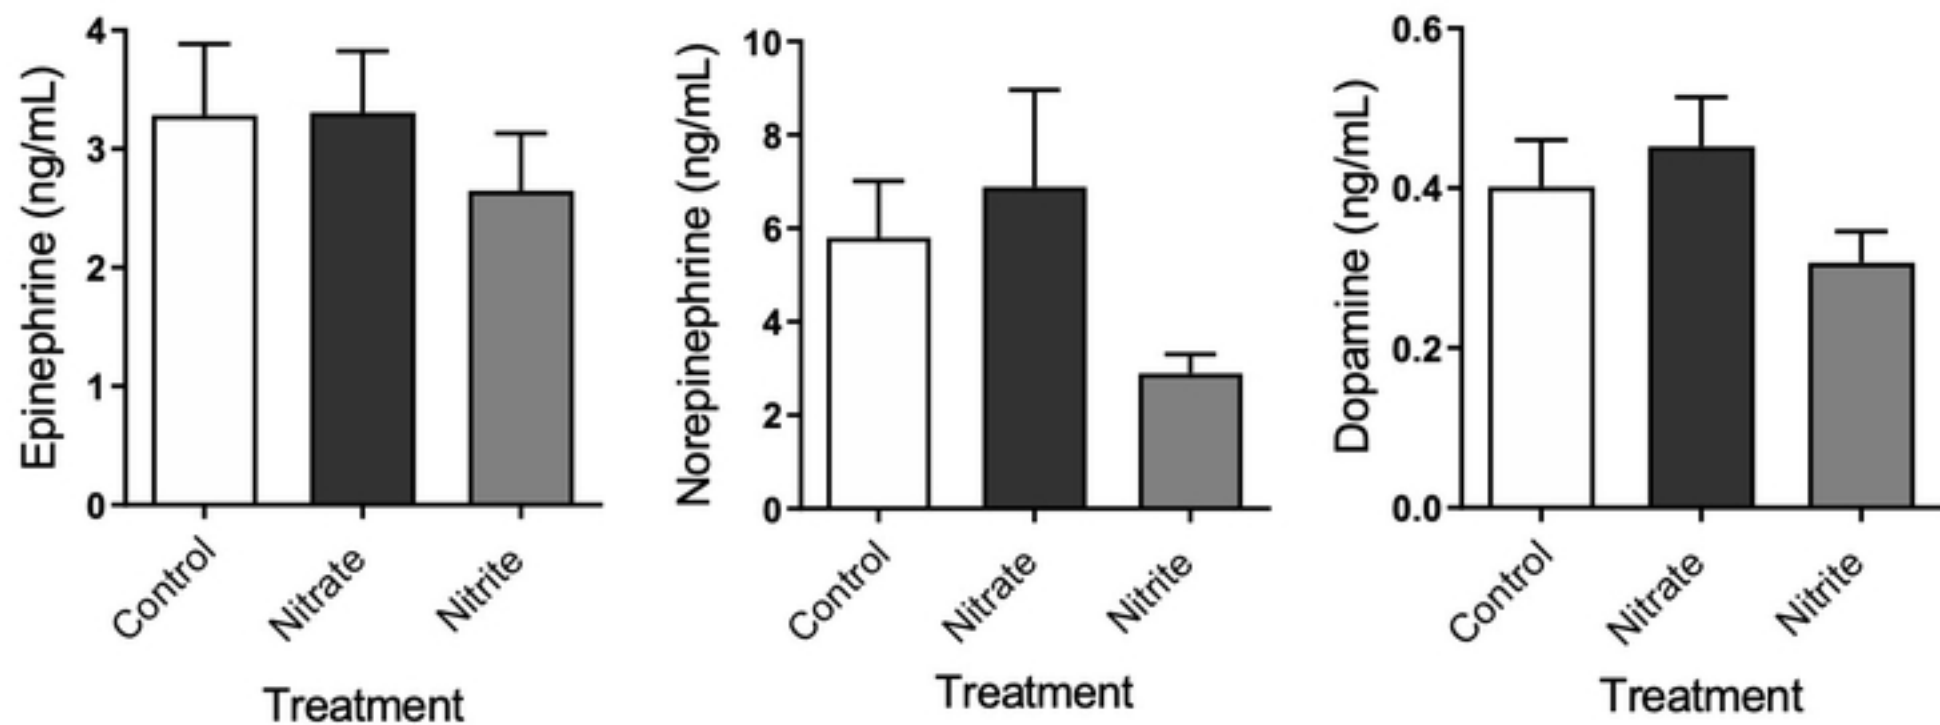

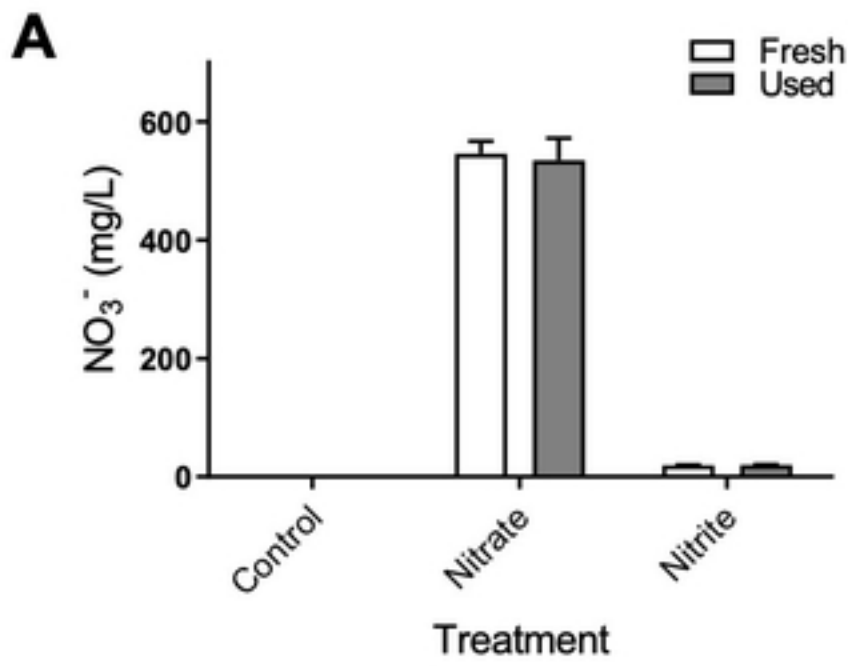

| Effect      | <i>P</i> value |
|-------------|----------------|
| Treatment   | < 0.001        |
| Use         | 0.7725         |
| Interaction | 0.9124         |

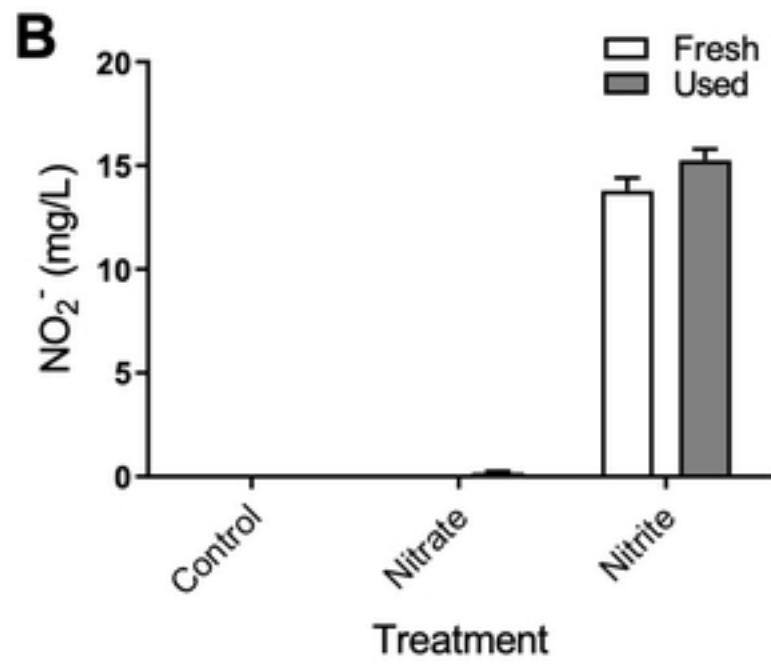

| Effect      | <i>P</i> value |
|-------------|----------------|
| Treatment   | < 0.001        |
| Use         | 0.0445         |
| Interaction | 0.0662         |

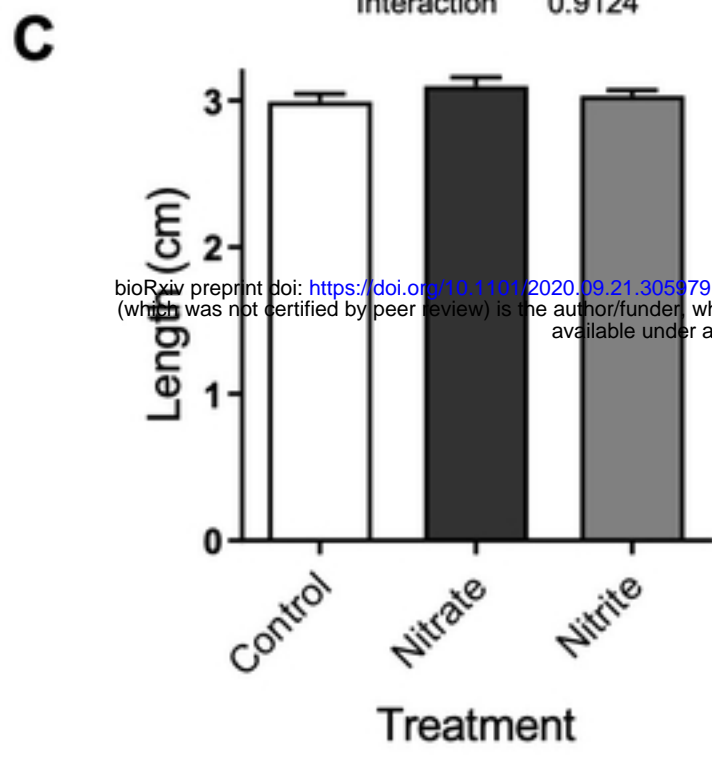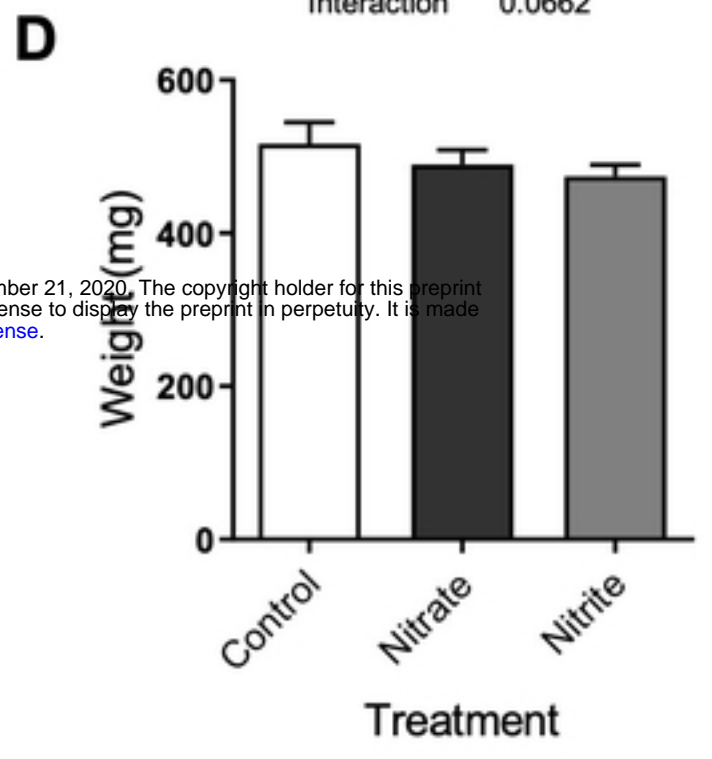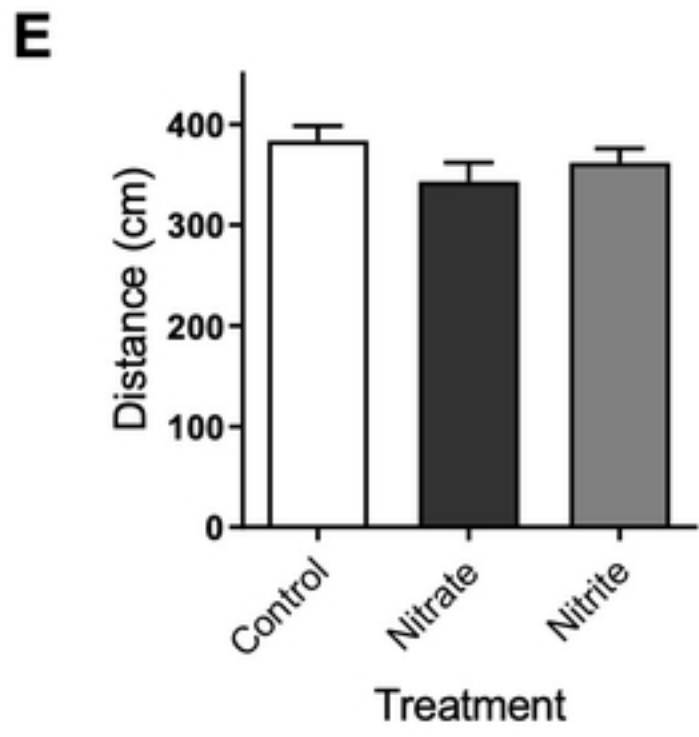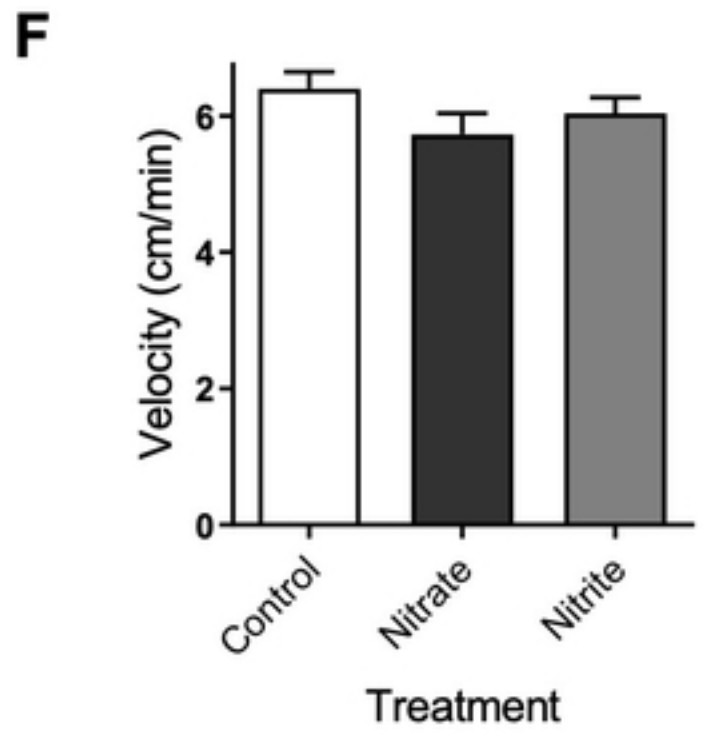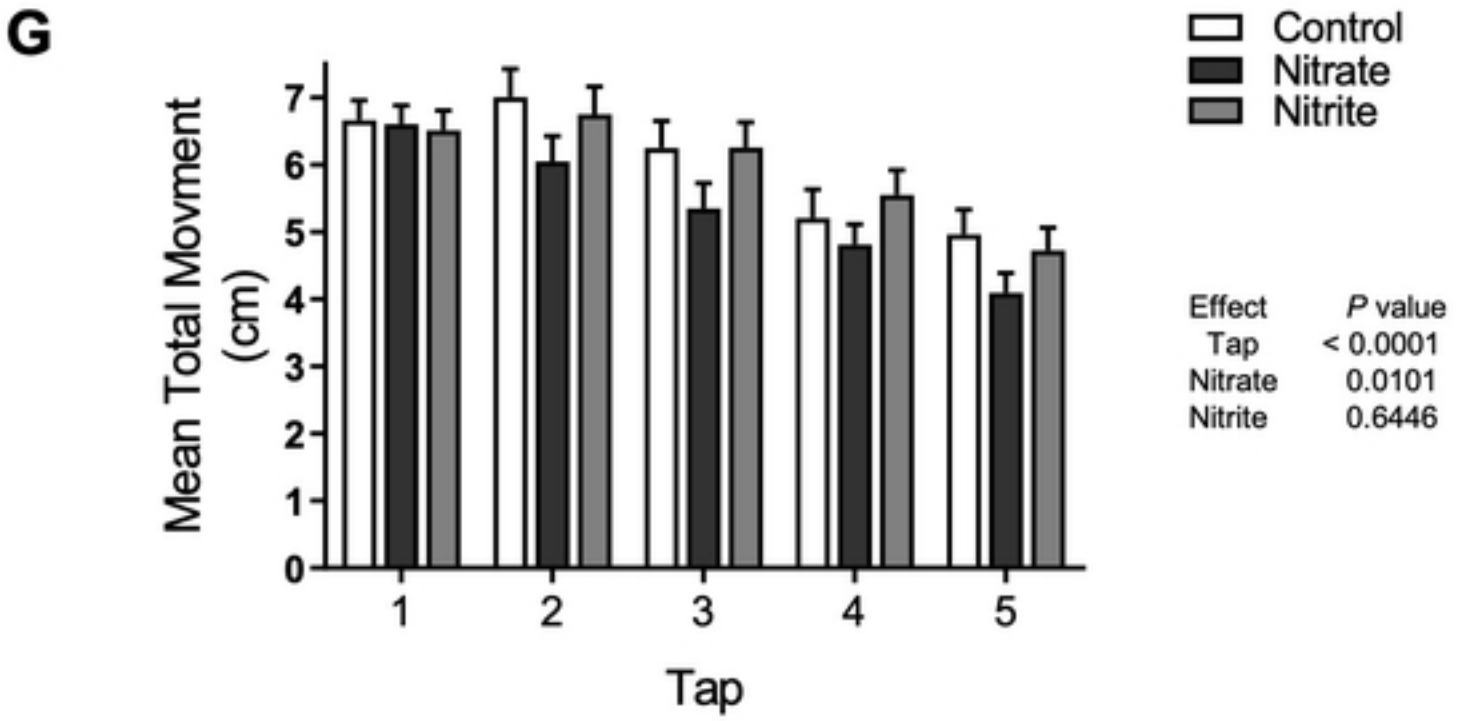

| Effect  | <i>P</i> value |
|---------|----------------|
| Tap     | < 0.0001       |
| Nitrate | 0.0101         |
| Nitrite | 0.6446         |

bioRxiv preprint doi: <https://doi.org/10.1101/2020.09.21.305979>; this version posted September 21, 2020. The copyright holder for this preprint (which was not certified by peer review) is the author/funder, who has granted bioRxiv a license to display the preprint in perpetuity. It is made available under aCC-BY 4.0 International license.

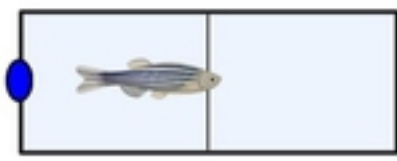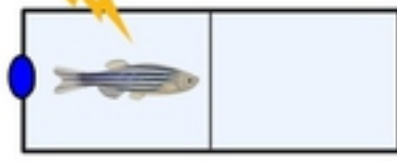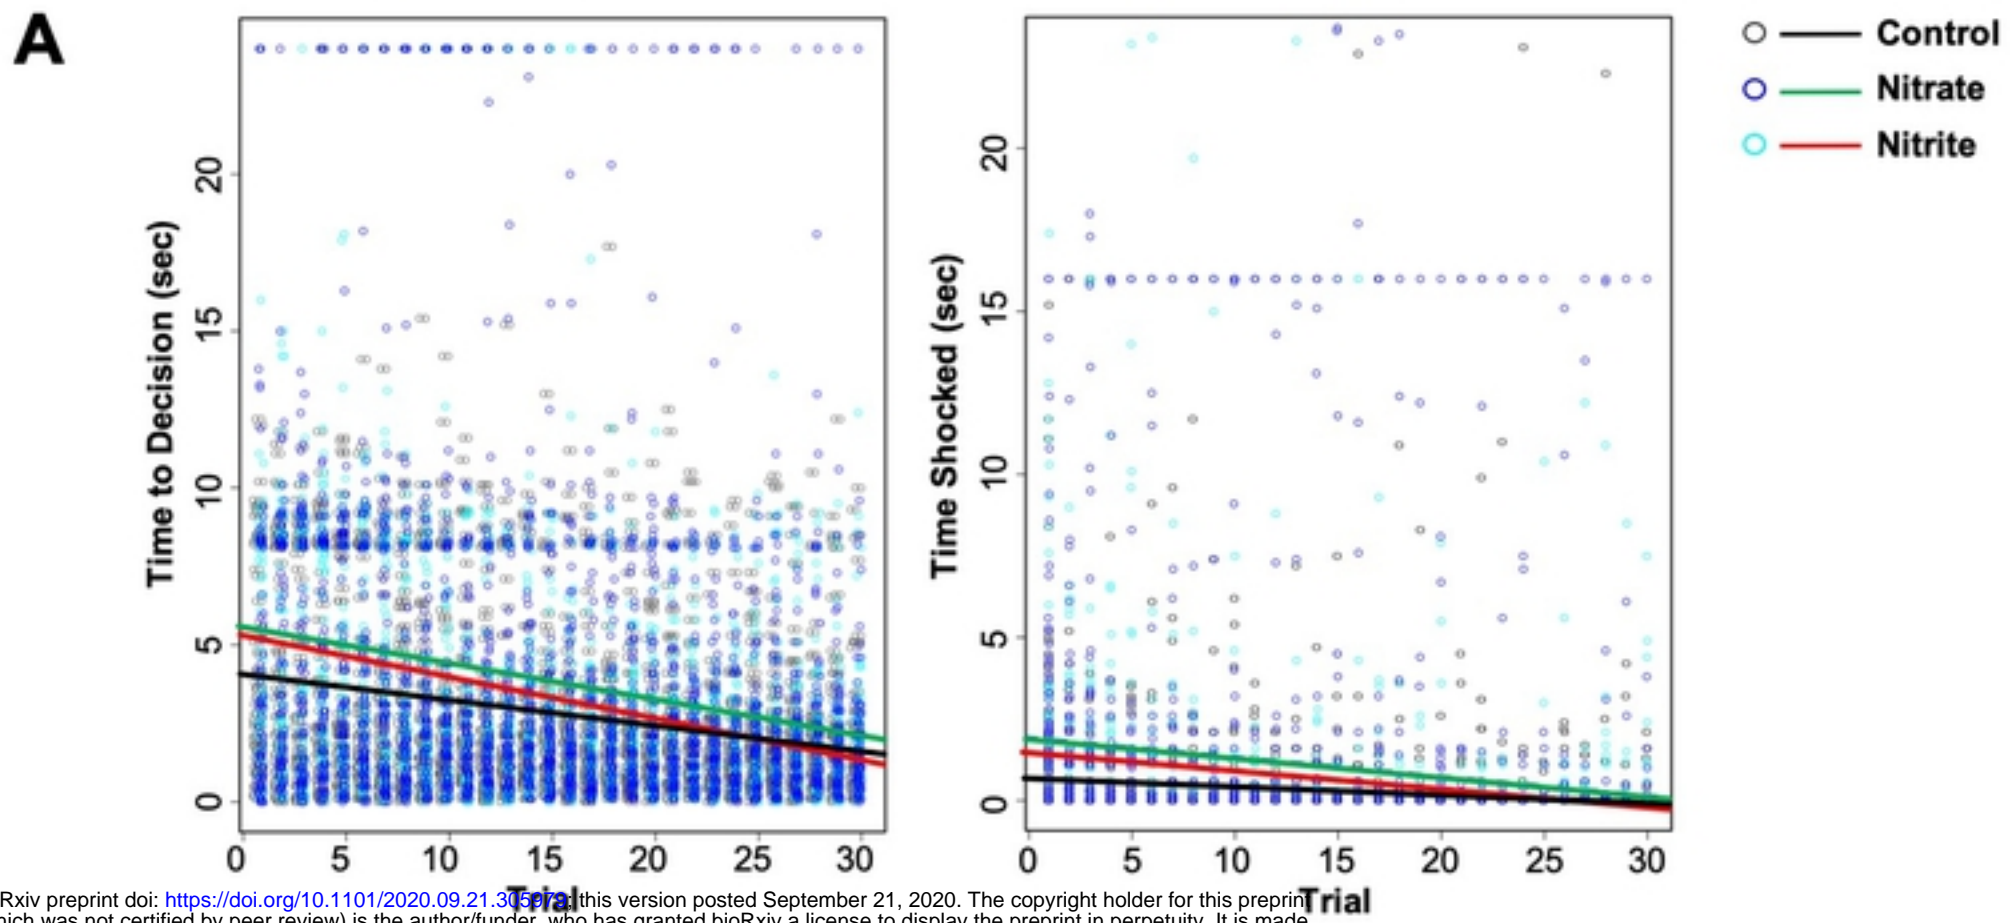

bioRxiv preprint doi: <https://doi.org/10.1101/2020.09.21.305959>; this version posted September 21, 2020. The copyright holder for this preprint (which was not certified by peer review) is the author/funder, who has granted bioRxiv a license to display the preprint in perpetuity. It is made available under aCC-BY 4.0 International license.

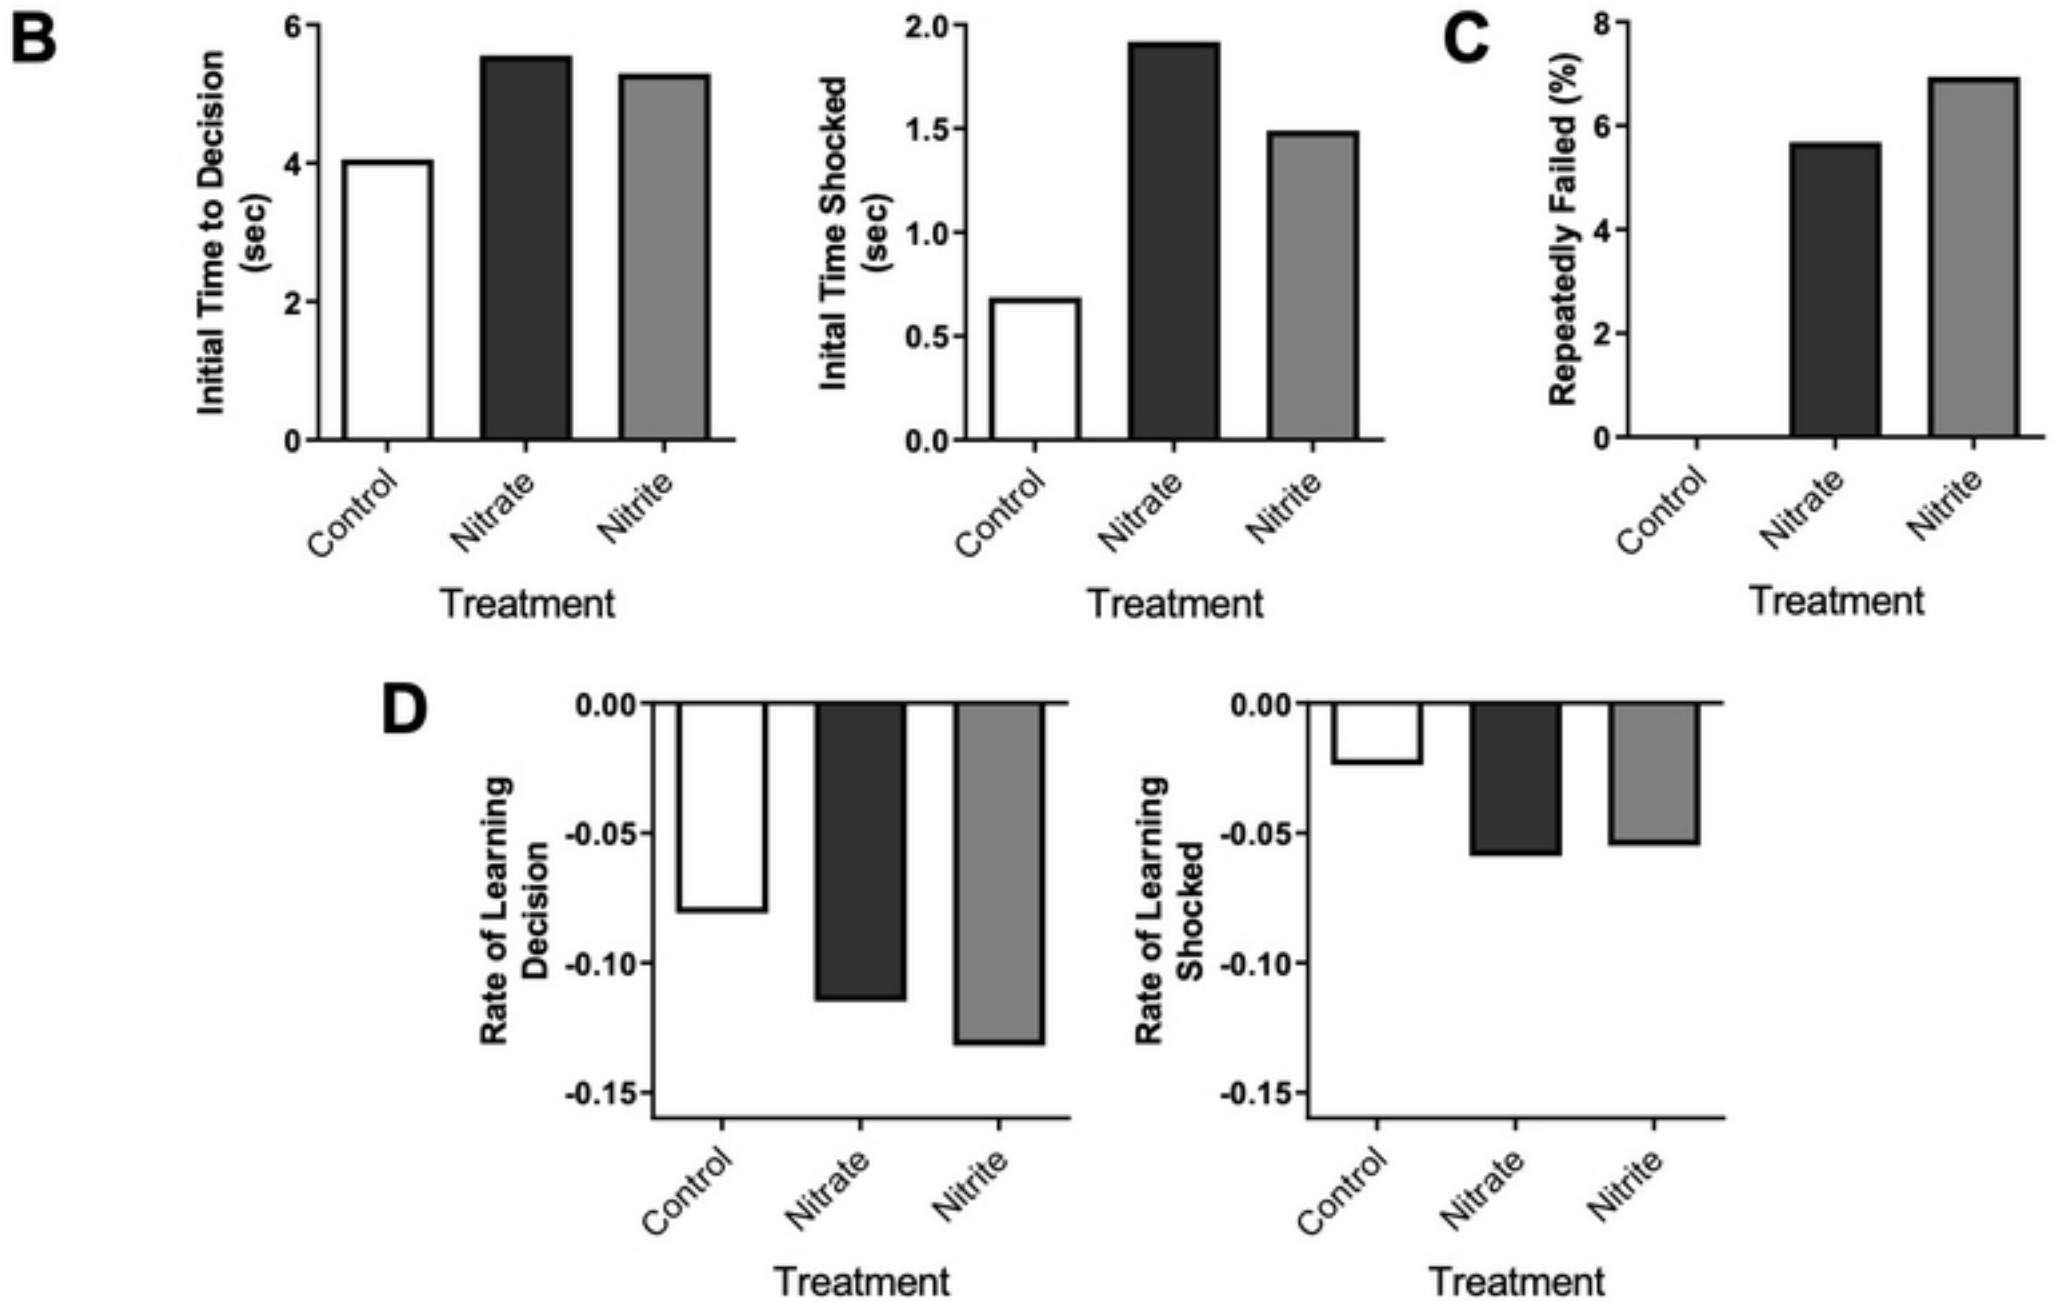

**E** Time to Decision

| Treatment | n   | All       |          |           |        |         |     | Completed Trials |         |     |
|-----------|-----|-----------|----------|-----------|--------|---------|-----|------------------|---------|-----|
|           |     | % Learned | % Failed | Intercept | Slope  | p value | sig | % Learned        | p value | sig |
| Control   | 109 | 51.376    | 48.624   | 4.057     | -0.081 | NA      | NA  | 51.376           | NA      | NA  |
| Nitrate   | 88  | 40.909    | 59.091   | 5.556     | -0.115 | 0       | Yes | 43.373           | 0       | Yes |
| Nitrite   | 72  | 50        | 50       | 5.298     | -0.132 | 0       | Yes | 53.731           | 0.5804  | No  |

Time Shocked

| Treatment | n   | All       |          |           |        |         |     | Completed Trials |         |     |
|-----------|-----|-----------|----------|-----------|--------|---------|-----|------------------|---------|-----|
|           |     | % Learned | % Failed | Intercept | Slope  | p value | sig | % Learned        | p value | sig |
| Control   | 109 | 61.468    | 36.697   | 0.687     | -0.024 | NA      | NA  | 61.468           | NA      | NA  |
| Nitrate   | 88  | 38.636    | 56.818   | 1.919     | -0.059 | 0       | Yes | 40.964           | 0       | Yes |
| Nitrite   | 72  | 41.667    | 58.333   | 1.491     | -0.055 | 0       | Yes | 44.776           | 0.9960  | No  |
